# Supplementary material for: Auto-regulation of Rab5 GEF activity in Rabex5 by allosteric structural changes, catalytic core dynamics and ubiquitin binding
Source: eLife. 2019 Nov 13;8:e46302. doi: 10.7554/eLife.46302 (PMC6855807; doi:10.7554/eLife.46302)
Supplement: Figure 3—source data 1. [file elife-46302-fig3-data1.xlsx]

## Sheet: Result sheet
Method name: Jeni_Mant (Modified)
Application: SparkControl				V1.2.20
Device: Spark 20M				Serial number: 1608002530
Firmware:				LUM:V5.0.1|ABS:V4.2.10|ABS_MEX:V5.0.4|MTP:V11.0.2|FLUOR:V5.0.8|FLUOR_FP:V5.0.2|FLUOR_BOTTOM:V5.0.2|FLUOR_MEM:V5.0.4|FLUOR_MEX:V5.0.4|GCM:V3.0.2|INJ:V3.0.10
Date:				2018-08-18
Time:				12:08
System				PC-8J53XD2
User				NT AUTHORITY\NETWORK SERVICE
Plate				[GRE384fb] - Greiner 384 Flat Black [GRE384fb]
Lid lifter				No lid
Humidity Cassette				No humidity cassette
List of actions in this measurement script:
Plate
	Shaking
	Kinetic
		Fluorescence Top Reading				MANT
Name				GRE384fb
Plate layout
Plate area				A2-M3
Start Time				2018-08-18 11:22:49
Shaking (Linear) Duration				20	s
Shaking (Linear) Position				Current
Shaking (Linear) Amplitude				1	mm
Shaking (Linear) Frequency				1440	rpm
End Time				2018-08-18 11:23:09
Mode	Kinetic
Kinetic duration				00:45:00	hh:mm:ss
Interval time				00:00:10	hh:mm:ss
Mode	Fluorescence Top Reading
Excitation				Monochromator
Excitation wavelength				355	nm
Excitation bandwidth				7.5	nm
Emission				Monochromator
Emission wavelength				448	nm
Emission bandwidth				7.5	nm
Gain				100	Manual
Mirror				AUTOMATIC
Number of flashes				20
Integration time				40	µs
Lag time				0	µs
Settle time				50	ms
Z-Position				20000	µm
Z-Position mode				Manual
Part of Plate				A2-M3
Start Time				2018-08-18 11:23:11
MANT
Cycle Nr.	1	2	3	4	5	6	7	8	9	10	11	12	13	14	15	16	17	18	19	20	21	22	23	24	25	26	27	28	29	30	31	32	33	34	35	36	37	38	39	40	41	42	43	44	45	46	47	48	49
Time [s]	0	9.631	19.626	29.616	39.618	49.613	59.614	69.622	79.617	89.619	99.611	109.622	119.616	129.622	139.622	149.632	159.624	169.63	179.635	189.625	199.623	209.631	219.629	229.627	239.634	249.624	259.632	269.635	279.629	289.632	299.612	309.619	319.621	329.628	339.622	349.616	359.613	369.61	379.609	389.618	399.601	409.608	419.61	429.614	439.622	449.611	459.611	469.614	479.619
Temp. [°C]	24.1	24.2	24.2	24.1	24.2	24.2	24.1	24.1	24.2	23.9	24.1	24.1	23.9	24.1	24.1	23.8	24.1	24.1	23.8	24	24.1	24.1	24	24.1	23.9	24	24	24.1	24	24.1	24.1	24	24	24.1	24	24	24	23.9	24	24.1	23.9	24.1	24.1	23.9	24	24.1	23.8	24	24
Time [s]	0	9.631	19.626	29.616	39.618	49.613	59.614	69.622	79.617	89.619	99.611	109.622	119.616	129.622	139.622	149.632	159.624	169.63	179.635	189.625	199.623	209.631	219.629	229.627	239.634	249.624	259.632	269.635	279.629	289.632	299.612	309.619	319.621	329.628	339.622	349.616	359.613	369.61	379.609	389.618	399.601	409.608	419.61	429.614	439.622	449.611	459.611	469.614	479.619
i137	723	716	711	711	707	707	710	694	688	705	695	688	676	677	670	667	688	677	673	666	648	672	653	656	654	653	654	662	643	642	650	652	646	639	634	625	630	651	629	632	630	618	622	626	633	599	615	633	598
i137	744	768	748	756	733	744	731	736	734	735	721	727	729	698	712	707	707	712	708	703	684	699	699	696	682	670	681	694	672	693	663	686	682	666	668	673	666	654	666	654	655	637	647	654	639	646	647	646	636
i137i87	569	564	552	520	489	483	470	457	453	450	434	431	415	419	396	407	398	394	402	388	377	382	376	374	390	372	371	364	372	373	360	359	367	378	358	356	359	369	359	364	360	368	356	351	364	356	361	354	356
i137i87	695	653	648	610	585	554	555	538	516	503	486	466	468	470	462	446	437	422	436	432	421	415	410	417	398	405	401	412	402	363	389	396	406	396	391	389	395	386	381	381	383	386	388	386	380	370	382	375	381
i138	643	623	609	603	602	575	567	557	553	541	533	521	534	500	508	501	492	469	480	466	462	459	458	452	447	442	431	428	430	430	430	406	420	411	409	410	406	407	403	394	404	403	389	392	377	381	390	378	383
i138	693	672	655	637	630	615	600	583	574	567	554	553	547	537	525	507	510	512	503	484	483	492	477	451	477	464	456	459	458	449	434	442	428	430	417	425	422	418	408	410	419	407	408	407	406	396	395	408	395
i138i87	619	585	584	553	546	527	513	497	494	479	464	463	457	454	448	436	437	432	413	416	410	408	414	410	408	396	405	392	397	403	401	399	394	392	393	398	379	388	382	385	398	391	379	389	383	384	386	388	387
i138i87	646	642	595	591	587	547	531	531	501	493	480	459	457	450	456	436	427	424	434	424	405	411	401	400	411	410	397	385	399	390	393	392	370	377	386	388	376	395	390	382	382	388	371	379	367	391	377	370	372
i139	751	744	751	732	736	741	726	709	714	712	716	706	700	693	685	668	671	670	668	664	666	654	663	652	638	660	646	630	647	640	640	628	620	623	612	603	613	609	605	606	612	613	602	605	611	593	595	595	593
i139	753	741	723	738	742	732	724	730	710	720	712	700	694	698	681	674	679	671	657	662	664	654	656	667	643	651	650	636	638	636	636	627	616	616	614	609	620	608	606	614	614	602	599	587	588	585	578	583	576
i139i87	724	735	727	714	712	712	695	689	694	690	685	681	684	665	664	652	661	648	641	634	627	643	635	626	630	616	615	625	601	621	593	597	604	585	590	584	573	588	572	570	574	565	562	563	558	548	544	549	550
i139i87	769	757	751	755	756	750	722	745	729	722	715	694	685	684	689	686	678	684	666	668	663	659	644	648	642	660	643	636	640	631	628	620	616	609	595	611	601	583	602	583	575	583	567	561	577	562	594	569	554
i140	800	794	807	776	784	777	767	771	769	762	759	762	761	739	748	733	750	732	732	731	730	711	700	725	713	709	701	711	694	702	678	687	665	684	682	678	669	675	683	681	654	664	650	650	658	645	652	651	642
i140	762	767	754	760	731	754	741	739	740	728	723	717	722	704	720	716	691	691	699	697	694	691	683	682	687	676	670	661	656	648	671	659	653	643	646	644	651	660	654	629	633	646	629	630	623	632	608	615	610
i140i87	685	675	676	664	634	634	633	619	632	599	608	578	584	584	567	578	543	552	544	526	539	513	523	513	517	498	502	494	496	483	477	468	480	482	475	476	456	458	453	446	458	456	445	438	456	440	426	429	441
i140i87	769	745	724	726	702	710	678	671	662	661	654	645	638	621	613	610	598	584	590	571	574	565	554	555	548	546	530	520	525	515	518	510	523	497	500	502	507	500	483	485	472	484	475	468	467	477	465	462	458
i141	650	658	659	639	652	633	640	623	615	617	616	606	612	588	603	575	577	585	568	566	573	567	553	555	547	539	544	542	555	537	545	524	532	523	519	509	518	511	519	508	510	506	506	503	502	485	489	478	477
i141	709	704	716	698	685	673	660	672	672	673	656	633	650	649	626	630	616	629	620	614	597	589	601	589	582	581	580	567	573	570	558	569	564	557	551	546	550	544	527	540	540	529	515	526	527	523	532	518	503
i78i87 blue	806	789	792	771	752	756	754	735	744	714	724	708	701	694	683	682	669	682	667	653	652	620	633	627	619	620	625	600	592	587	614	591	591	591	581	570	575	566	559	556	566	555	541	541	537	530	553	543	543
i78i87 blue	799	775	753	752	736	731	725	709	711	694	689	676	672	671	644	644	659	635	624	634	614	629	589	599	593	600	601	573	579	590	567	573	554	563	555	542	529	537	555	535	530	530	514	518	512	524	505	495	513
i78i87 yellow	750	743	731	691	695	659	663	634	636	635	614	598	602	581	572	584	551	566	542	549	534	528	535	521	508	501	502	503	496	498	491	476	477	469	472	481	463	456	465	460	454	469	450	446	454	431	443	451	442
i78i87 yellow	694	695	670	679	649	626	627	600	593	596	566	558	552	542	533	533	526	512	507	494	492	493	484	487	482	471	465	463	453	462	454	443	426	436	425	440	435	422	422	414	416	419	411	418	407	411	407	406	398
p273	607	605	585	573	584	558	563	563	552	541	541	532	505	515	518	502	499	504	490	479	477	472	473	470	471	458	451	453	455	442	441	447	424	438	435	435	432	417	414	412	413	401	419	408	416	390	399	393	399
p273	853	841	824	799	792	788	778	791	753	733	730	724	708	703	681	696	704	683	668	666	658	651	655	651	634	634	633	631	627	620	611	605	597	594	596	586	585	591	583	588	562	580	580	570	564	568	556	565	578
p281	902	884	879	848	843	822	820	810	800	770	763	745	744	729	726	726	714	716	708	689	700	696	691	687	671	684	661	655	659	655	666	650	660	656	638	648	630	646	650	631	624	646	637	624	636	612	644	620	615
p281	686	675	654	637	610	607	601	576	564	552	545	551	533	529	512	505	496	486	488	475	468	472	475	454	458	452	439	444	452	428	428	418	425	422	417	411	422	401	406	400	405	405	400	391	399	408	400	392	393
One phase decay
Best-fit values	i137	i137	i137i87	i137i87	i138	i138	i138i87	i138i87	i139	i139	i139i87	i139i87	i140	i140	i140i87	i140i87	i141	i141	i78i87 blue	i78i87 blue	i78i87 yellow	i78i87 yellow	p273	p273	p281	p281
Y0	710.6	751.2	575.2	688.1	636.3	668	609.7	652.2	737.5	738	724.7	758	791.7	755.7	682.6	747.8	652.9	702.9	789.9	766.7	733.3	695.1	601.4	841.6	866.3	677.5
Plateau	426.7	459.3	354.4	375.3	347.8	344.6	375.4	367	386.9	382.8	354.5	362.4	381.7	388.6	361.9	376.2	345.2	358.8	410.6	388.8	373.5	356.6	334.4	506.2	564.4	363.6
K	0.0008348	0.0009661	0.01005	0.009774	0.004427	0.003893	0.008628	0.008898	0.001099	0.00114	0.001308	0.00135	0.0008984	0.000967	0.003116	0.003103	0.001567	0.001647	0.002262	0.002353	0.003778	0.004287	0.002923	0.003792	0.003597	0.005127
Half Life	830.4	717.5	68.98	70.92	156.6	178.1	80.34	77.9	630.6	607.9	530.1	513.5	771.6	716.8	222.5	223.4	442.4	420.8	306.4	294.6	183.5	161.7	237.1	182.8	192.7	135.2
Tau	1198	1035	99.51	102.3	225.9	256.9	115.9	112.4	909.8	877	764.8	740.8	1113	1034	320.9	322.2	638.2	607.1	442.1	425.1	264.7	233.3	342.1	263.7	278	195.1
Span	283.9	291.8	220.7	312.8	288.5	323.4	234.3	285.2	350.6	355.2	370.2	395.6	410	367.1	320.7	371.6	307.6	344.1	379.3	377.9	359.8	338.5	267.1	335.4	301.9	313.9
Std. Error
Y0	1.734	1.955	3.799	4.193	2.502	2.819	3.371	4.002	1.986	1.933	1.829	2.107	1.774	1.809	2.495	2.469	1.836	2.16	2.556	2.567	2.887	2.846	2.317	3.267	4.315	3.187
Plateau	2.763	2.354	0.4346	0.4863	0.4569	0.564	0.4161	0.4863	1.885	1.717	1.283	1.402	2.453	2.174	0.5953	0.5911	0.9665	1.056	0.8338	0.8021	0.5904	0.5314	0.5846	0.6663	0.9162	0.5286
K	2.091e-05	2.246e-05	0.0002675	0.0002026	6.128e-05	5.501e-05	0.0001919	0.0001931	1.89e-05	1.818e-05	1.674e-05	1.815e-05	1.463e-05	1.652e-05	4.086e-05	3.478e-05	2.111e-05	2.258e-05	2.829e-05	2.921e-05	4.935e-05	5.773e-05	4.338e-05	6.009e-05	8.436e-05	8.202e-05
Span	2.312	2.133	3.783	4.176	2.467	2.771	3.354	3.983	1.951	1.863	1.699	1.951	2.117	1.972	2.433	2.407	1.701	2.008	2.444	2.462	2.835	2.804	2.253	3.209	4.232	3.152
95% Confidence Intervals
Y0	707.2 to 714.0	747.3 to 755.0	567.7 to 582.6	679.9 to 696.3	631.4 to 641.2	662.5 to 673.5	603.1 to 616.3	644.3 to 660.0	733.6 to 741.4	734.2 to 741.8	721.1 to 728.2	753.8 to 762.1	788.2 to 795.2	752.2 to 759.3	677.7 to 687.5	742.9 to 752.6	649.3 to 656.5	698.6 to 707.1	784.9 to 794.9	761.7 to 771.8	727.7 to 739.0	689.5 to 700.7	596.9 to 606.0	835.2 to 848.0	857.8 to 874.7	671.2 to 683.7
Plateau	421.2 to 432.1	454.7 to 463.9	353.6 to 355.3	374.3 to 376.2	346.9 to 348.6	343.5 to 345.7	374.5 to 376.2	366.0 to 367.9	383.2 to 390.5	379.5 to 386.2	352.0 to 357.0	359.6 to 365.1	376.9 to 386.5	384.4 to 392.9	360.7 to 363.1	375.0 to 377.3	343.3 to 347.1	356.7 to 360.9	409.0 to 412.3	387.3 to 390.4	372.4 to 374.7	355.5 to 357.6	333.2 to 335.5	504.9 to 507.5	562.6 to 566.2	362.6 to 364.6
K	0.0007938 to 0.0008758	0.0009221 to 0.001010	0.009525 to 0.01057	0.009377 to 0.01017	0.004307 to 0.004547	0.003785 to 0.004000	0.008251 to 0.009004	0.008520 to 0.009276	0.001062 to 0.001136	0.001105 to 0.001176	0.001275 to 0.001340	0.001314 to 0.001385	0.0008697 to 0.0009270	0.0009346 to 0.0009994	0.003036 to 0.003196	0.003035 to 0.003172	0.001525 to 0.001608	0.001603 to 0.001691	0.002207 to 0.002318	0.002295 to 0.002410	0.003681 to 0.003875	0.004174 to 0.004400	0.002838 to 0.003008	0.003674 to 0.003910	0.003432 to 0.003763	0.004966 to 0.005287
Half Life	791.5 to 873.2	686.2 to 751.7	65.56 to 72.77	68.15 to 73.92	152.4 to 160.9	173.3 to 183.1	76.98 to 84.00	74.72 to 81.36	610.1 to 652.6	589.5 to 627.5	517.1 to 543.7	500.3 to 527.4	747.7 to 797.0	693.6 to 741.7	216.9 to 228.3	218.5 to 228.4	431.0 to 454.4	409.8 to 432.5	299.1 to 314.1	287.6 to 302.0	178.9 to 188.3	157.5 to 166.1	230.4 to 244.2	177.3 to 188.7	184.2 to 202.0	131.1 to 139.6
Tau	1142 to 1260	990.0 to 1085	94.58 to 105.0	98.32 to 106.6	219.9 to 232.2	250.0 to 264.2	111.1 to 121.2	107.8 to 117.4	880.1 to 941.5	850.4 to 905.3	746.0 to 784.4	721.8 to 760.8	1079 to 1150	1001 to 1070	312.9 to 329.4	315.3 to 329.5	621.8 to 655.5	591.2 to 623.9	431.5 to 453.2	415.0 to 435.7	258.1 to 271.7	227.3 to 239.6	332.4 to 352.3	255.8 to 272.2	265.8 to 291.4	189.1 to 201.4
Span	279.4 to 288.5	287.6 to 296.0	213.3 to 228.1	304.6 to 321.0	283.7 to 293.4	318.0 to 328.9	227.7 to 240.9	277.4 to 293.0	346.8 to 354.4	351.5 to 358.8	366.8 to 373.5	391.7 to 399.4	405.9 to 414.2	363.2 to 370.9	315.9 to 325.4	366.9 to 376.3	304.3 to 311.0	340.1 to 348.0	374.5 to 384.1	373.1 to 382.7	354.2 to 365.3	333.0 to 344.0	262.7 to 271.5	329.1 to 341.7	293.6 to 310.2	307.7 to 320.0
Goodness of Fit
Degrees of Freedom	268	268	268	268	268	268	268	268	268	268	268	268	268	268	268	268	268	268	268	268	268	268	268	268	268	268
R²	0.9887	0.9878	0.9552	0.9723	0.9878	0.9875	0.9683	0.9698	0.992	0.9927	0.9944	0.9937	0.9946	0.9934	0.9897	0.9924	0.9926	0.9919	0.9916	0.9916	0.9894	0.9885	0.987	0.9844	0.9668	0.9836
Absolute Sum of Squares	15601	18572	11701	14578	10108	14343	10422	14325	17982	16701	13856	18043	15816	15893	13594	13355	12471	16690	18541	18129	15433	13445	12367	19700	35975	14449
Sy.x	7.63	8.325	6.608	7.375	6.141	7.316	6.236	7.311	8.191	7.894	7.19	8.205	7.682	7.701	7.122	7.059	6.822	7.892	8.318	8.225	7.589	7.083	6.793	8.574	11.59	7.343
Constraints
K	K > 0.0	K > 0.0	K > 0.0	K > 0.0	K > 0.0	K > 0.0	K > 0.0	K > 0.0	K > 0.0	K > 0.0	K > 0.0	K > 0.0	K > 0.0	K > 0.0	K > 0.0	K > 0.0	K > 0.0	K > 0.0	K > 0.0	K > 0.0	K > 0.0	K > 0.0	K > 0.0	K > 0.0	K > 0.0	K > 0.0
Number of points
Analyzed	271	271	271	271	271	271	271	271	271	271	271	271	271	271	271	271	271	271	271	271	271	271	271	271	271	271
	i137		i137i87		i138		i138i87		i139		i139i87		i140		i140i87		i141		i78i87 blue		i78i87 yellow		p273		p281
% Error	0.0250479	0.0232481	0.0266169	0.0207285	0.0138423	0.0141305	0.0222415	0.0217015	0.0171975	0.0159474	0.0127982	0.0134444	0.0162845	0.0170838	0.013113	0.0112085	0.0134716	0.0137098	0.0125066	0.0124139	0.0130625	0.0134663	0.0148409	0.0158465	0.0234529	0.0159977
Ave	0.00090045		0.009912		0.00416		0.008763		0.0011195		0.001329		0.0009327		0.0031095		0.001607		0.0023075		0.0040325		0.0033575		0.004362
[Enzyme]	3.5e-07		4.8e-07		4.2e-07		5.4e-07		5.3e-07		4.8e-07		4.9e-07		4.2e-07		2e-07		4.8e-07		4.4e-07		2.7e-07		2.7e-07
kcat/Km	2572.71		20650		9904.76		16227.8		2112.26		2768.75		1903.47		7403.57		8035		4807.29		9164.77		12435.2		16155.6
[truncated: 222 more columns]
