# Supplementary material for: Auto-regulation of Rab5 GEF activity in Rabex5 by allosteric structural changes, catalytic core dynamics and ubiquitin binding
Source: eLife. 2019 Nov 13;8:e46302. doi: 10.7554/eLife.46302 (PMC6855807; doi:10.7554/eLife.46302)
Supplement: Figure 3—source data 2. [file elife-46302-fig3-data2.xlsx]

## Sheet: Sheet1
	Exp 1	Exp 2	Exp 3	Exp 4	Ave	Std Error	Stdev
i137	2859	2602	2573	2428	2534.33	30.412	76.1154	0.0300337
i137i87	17244	18411	20650	16467	18509.3	222.112	1709.12	0.0923381
i138	10493	9786	9905	9015	9568.67	114.824	394.504	0.0412288
i138i87	15863	13499	16228	14046	14591	175.092	1178.88	0.0807949
i139	1661	2181	2112	2091	2128	25.536	38.4448	0.0180661
i139i87	3081	3064	2769	2810	2881	34.572	130.479	0.0452893
i140	2273	2113	1903	1977	1997.67	23.972	86.9687	0.0435351
i140i87	9110	7354	7404	6971	7243	86.916	193.413	0.0267035
i141	8240	8195	8035	7618	7949.33	95.392	243.223	0.0305967
i78i87 blue	4885	4861	4807	4564	4744	56.928	129.174	0.027229
i78i87 yellow	9486	9055	9165	8080	8766.67	105.2	487.619	0.0556219
p273		12851	12435	11319	12201.7	146.42	646.833	0.0530119
p281	20346	19583	16156	16198	17312.3	207.748	1605.7	0.0927486
i78					3273.36	39.2803
