# Supplementary material for: Auto-regulation of Rab5 GEF activity in Rabex5 by allosteric structural changes, catalytic core dynamics and ubiquitin binding
Source: eLife. 2019 Nov 13;8:e46302. doi: 10.7554/eLife.46302 (PMC6855807; doi:10.7554/eLife.46302)
Supplement: Figure 4—source data 1. [file elife-46302-fig4-data1.xlsx]

## Sheet: RabexMutants
															2014-09-01												2016-05-01
Sequence	Charge	Start	End	Features	p273 vs i141	Stdev	i78 vs p273	Stdev	i78 vs i138	Stdev	i78 vs i141	Stdev	i78 vs i78i87	Stdev	i78vsi78i87	Stdev	i138 vs i138i87	Stdev	i139 vs i139i87	Stdev	i78i87 vs i137i87	Stdev	i78i87 vs i138i87	Stdev	i78i87 vs i139i87	Stdev	Rabex + Rab5o	Stdev	i78i87 vs i140i87	Stdev	i140 vs i140i87	Stdev
SLKSERRGIHVDQSEL	2	2	17								0.3	0.9	-0.5	1					-0.7	0.9					0.4	1.1			1.3	0.6	-1.7	0.5
SLKSERRGIHVDQSEL	3	2	17								2.4	1	-0.5	0.7	-0.5	3.1			-1	0.6					0.5	0.6			1.7	0.4	-1.5	0.3
KSERRGIHVDQSEL	2	4	17								5.5	1.7	-0.3	1.4	2.4	4.9									2.6	0.9			2.1	0.4	-1.4	0.5
KSERRGIHVDQSEL	3	4	17								5.2	1.7	3.6	1.4					0	0.3					0.1	0.4			0.9	0.5	-0.6	0.4
KSERRGIHVDQSELL	2	4	18																-0.6	0.5					-3.9	2.1			4.7	1.4	0	1.2
LCKKGCGY	1	18	25	ZnF UBD							-19.6	4.3	-21.4	6.5
LCKKGCGY	2	18	25	ZnF UBD							-18.2	2.5	-24.7	2.3					-0.9	0.8					-2.1	1.2			6.4	0.2	-1.6	0.6
LCKKGCGYYGNPAWQG	2	18	33	ZnF UBD							-29.3	4.1	-38.2	3.9					-1.1	1					-1.9	1.6			13.8	1.2	-0.9	0.5
LCKKGCGYYGNPAWQGF	2	18	34	ZnF UBD							-31.1	1.9	-44	1.6	-14.7	5.4			-3.4	0.3					-1.4	0.8	2.2	3.7	12.4	0.4	-1.8	0.5
LCKKGCGYYGNPAWQGF	3	18	34	ZnF UBD							-30.2	2.9	-40.5	2.8	-11.6	5.9			-3.8	0.4					-1.6	0.7	1.1	2.3	12.5	0.6	-2.5	0.7
LCKKGCGYYGNPAWQGFCSKC	3	18	38	ZnF UBD							-38.2	3.6	-46.5	3.6	-17.2	5.4			-3.1	0.5					-1	1.2			12.7	0.3	-2.9	0.5
YGNPAWQGF	1	26	34	ZnF UBD
FCSKC	1	34	38	ZnF UBD							-37	4	-45.6	3.8					-3.5	1.2					-0.4	0.8			20.1	2	-3.3	2.2
CSKCWREEYHKARQKQIQED	3	35	54	MIU UBD							-5.8	1.2	-5.4	0.9	-4.1	1.1			-1.3	0.3					0.2	0.5			1.9	1.2	-2.1	1
CSKCWREEYHKARQKQIQEDWEL	3	35	57	MIU UBD											-3.3	3.4
WREEYHKARQKQIQE	2	39	53	MIU UBD							3.5	1.7	3.8	1.3					-0.1	1.2					0	1.2			-0.8	2.6	-1.7	2.3
WREEYHKARQKQIQE	3	39	53	MIU UBD							1.8	2.8	5.5	2					0.4	0.5					0.1	0.7			0	0.4	0.3	0.7
WREEYHKARQKQIQED	2	39	54	MIU UBD							2	2.1	5	1.7	1	4.4			-0.7	0.5					-0.3	0.3			0.2	0.3	-0.2	0.4
WREEYHKARQKQIQED	3	39	54	MIU UBD							1.9	1.9	5	1.5	1.1	4			-0.2	0.5					0.1	0.6	0.8	1.4	0.4	0.2	-0.1	0.4
WREEYHKARQKQIQED	4	39	54	MIU UBD							2	2.1	4.4	1.6					-0.3	0.6					0.2	0.4	-1.3	2	0.7	0.3	-0.2	0.3
WREEYHKARQKQIQEDWE	2	39	56	MIU UBD											1	1.9
WREEYHKARQKQIQEDWE	3	39	56	MIU UBD							1.7	1.5	3.4	1.5	0.9	1.8			-1	0.6					0.8	0.6			0.6	0.7	-0.7	0.3
WREEYHKARQKQIQEDWEL	2	39	57	MIU UBD											2.5	1.3
WREEYHKARQKQIQEDWEL	3	39	57	MIU UBD							2	2.6	2.1	2.1	3.1	2.1			-2.3	1					-0.1	1			0.4	0.5	-1.7	0.4
WREEYHKARQKQIQEDWELAERLQREEEEA	5	39	68	MIU UBD											-1.7	0.9
LAERL	1	57	61								-11.7	6.7
LAERLQREEEEA	2	57	68								-1.9	1.8	2.5	1.4	-10.2	3.1			-3.9	0.7	1	1			1.1	0.5			2.5	0.5	-2.9	0.7
LAERLQREEEEAF	2	57	69
AERLQREEE	2	58	66								1.2	3.3	10.3	3	1	5.7			0.9	0.7	-4	4			-0.3	1.3			0.2	0.5	2.1	0.5
AERLQREEEEA	1	58	68
AERLQREEEEA	2	58	68								0	1.7									1	0					0.2	4.6
AERLQREEEEA	3	58	68								1.7	2.1	7.9	1.7					-1.6	0.5	-1	2			0	0.4	-3.6	7.1	0.8	0.7	0.1	0.5
AERLQREEEEAF	2	58	69								-0.9	4.1							-0.4	1.7					0.9	1.5			0.5	1.7	0.1	1.1
AERLQREEEEAFASSQSSQGAQSLT	3	58	82								21.5	17.3
FASSQSSQGAQSLT	2	69	82								2.7	4.4	16.1	3.7							-1	1
FASSQSSQGAQSLTF	2	69	83																		2	1
FASSQSSQGAQSLTFSKF	2	69	86
FSKFEEKKTNEKTRKVTTVKKFFSA	4	83	107	Linker							-2.9	2.3	1.3	2.2
FSKFEEKKTNEKTRKVTTVKKFFSASSRVGAKKAEIQ	5	83	119	Linker
FSKFEEKKTNEKTRKVTTVKKFFSASSRVGAKKAEIQE	4	83	120	Linker							11.2	7.2	26.4	7.1	53.2	1.7					-1	1
FSKFEEKKTNEKTRKVTTVKKFFSASSRVGAKKAEIQE	5	83	120	Linker							6.1	4.6	22.3	3.9	51.3	1.1					-1	0
FSKFEEKKTNEKTRKVTTVKKFFSASSRVGAKKAEIQE	6	83	120	Linker							11.2	4.7	27.9	4.7							-1	1
EEKKTNEKTRKVTTVKKFFSA	4	87	107	Linker									-3.8	1.3
EEKKTNEKTRKVTTVKKFFSASSRVGAKKAEIQE	4	87	120	Linker							10.9	2.7	24.9	2.3							-1	1
EEKKTNEKTRKVTTVKKFFSASSRVGAKKAEIQE	5	87	120	Linker							8.1	3.2	17.5	3.6							0	2
SASSRVGAKKAEIQ	2	106	119	Linker							2	3.7
SASSRVGAKKAEIQ	3	106	119	Linker							2.6	1.5
SASSRVGAKKAEIQEAKAPSPSINRQTSIETDRVSKE	5	106	142								-0.3	1.5	-0.3	0.5							-2	1
SASSRVGAKKAEIQEAKAPSPSINRQTSIETDRVSKE	6	106	142								0.4	0.5	-1	0.2							-1	1
SSRVGAKKAEIQE	2	108	120	Linker							-5.4	4
EAKAPSPSINRQTSIET	2	120	136								4.2	1	7	1.6
EAKAPSPSINRQTSIETDRVSKE	4	120	142								1	0.7	0.2	1.5							0	6					-2.8	5.3
AKAPSPSINRQTSIE	2	121	135								2.5	7.4	5.8	6.3
AKAPSPSINRQTSIET	2	121	136								7.6	7.1	16.1	6					0.4	1.3	-2	1			2.1	1	0	0.9
TSIETDRVSKE	2	132	142	4HB											-2.1	4.8	-4	7									1.5	2.9
DRVSKEF	1	137	143	4HB																					-1.6	2.2
DRVSKEF	2	137	143	4HB			13.7	3.7	9.7	5.8	5.8	3.7	11.4	3.8			2	2	4.5	1.2	-2	2	1	2	-2.6	1.8	3	2.6
IEFLKTFHKTGQEIYKQTKL	3	144	163	4HB	-9	2									-0.4	1.2	-5	2	0.6	0.6	1	1	2	1	-5.4	1.2			9.7	0.9	-0.8	1.4
IEFLKTFHKTGQEIYKQTKL	4	144	163	4HB	-9	2											-5	1	0.7	0.8	2	1	1	1	-5.2	1.7			10	0.3	-2.1	0.5
LKTFHKTGQE	2	147	156	4HB	-3	2	5.2	3	5.9	3.4	3.5	2.8	5.6	2.8			-3	2	0.2	0.8	3	3	1	3	-0.9	0.5	0	2.3	3.8	0.9	0.5	0.5
LKTFHKTGQE	3	147	156	4HB			0.8	12	9.8	4.8	6.6	4.4	9.9	4.3					1.9	1.2					-3.9	2.9			1.5	2.4	-3	1.9
LKTFHKTGQEIYKQTKL	2	147	163	4HB	-6	1	5	1.8	1.2	1.1	-3.2	0.9	-1.7	1	-2.3	1.8	-3	0	-0.6	1.2	1	1	1	1	-5.5	1.3	-0.2	0.6	4.4	0.3	-1	0.5
LKTFHKTGQEIYKQTKL	3	147	163	4HB	-8	0	5.8	0.7	1.4	0.9	-5.4	1	-4	1.5	-2.3	1.8	-4	1	0.2	0.5	1	0	1	0	-4.1	0.5	-0.2	0.5	4.2	0.3	-1.3	0.6
LKTFHKTGQEIYKQTKLFL	2	147	165	4HB	-9	2	-2.1	3.2	-5.8	3.2	-9.4	3.1	-8.6	3.1	0.5	0.7	1	1	-1.2	0.9	2	1	4	1	-5.1	1.4			3.9	1.1	1.5	0.9
LKTFHKTGQEIYKQTKLFL	3	147	165	4HB	-5	1	12.9	6.5	-1.7	1.3	-4.3	0.5	-2.8	0.9	-0.4	0.5	-3	1	-0.3	0.5	1	0	1	0	-3.6	0.6			3.4	0.7	-0.6	0.5
KTFHKTGQEIYKQTKL	3	148	163	4HB											-1.4	1.8
IYKQTKL	2	157	163	4HB	-6	2	12.2	0.7	5.1	0.7	1	0.7	0.6	0.8			1	2	0.3	1.5	4	2	4	2	-1.7	1.3	-1.6	2.2	7.7	0.2	-0.3	0.9
FLEAM	1	164	168	4HB	-7	0	6.2	0.6	0.4	1.1	-0.8	0.4	-1.8	0.4			-1	1	-0.7	2	1	1	2	1			3.4	1.8	0.7	1	-1.3	0.6
FLEAMHYKRDLSIE	2	164	177	4HB	-3	1	2.6	1.1	-2.4	1.3	-2.5	1.1	2.3	1			2	1	2.7	0.7	2	1	0	1	-1.9	0.8	-0.4	1.7	-1.7	0.7	2.4	0.3
FLEAMHYKRDLSIE	3	164	177	4HB	0	1	3.7	1.7	0.6	1.9	0.6	1.7	4.8	1.7			3	0	2.3	0.3	0	1	-1	1	-1.9	0.5	-0.3	2.3	-0.6	0.3	2.3	0.4
FLEAMHYKRDLSIEE	2	164	178	4HB	-2	1	2.1	1.1	-1	2	-1.1	1.6	3.7	1.5	3.6	1.9	3	0	2.6	0.4	1	1	-1	1	-2.6	0.4	3.2	1.5	-1.6	0.1	1.6	0.4
FLEAMHYKRDLSIEE	3	164	178	4HB	0	1									4.2	1.2	3	1	2.6	0.4	1	1	-1	0	-2.5	0.5	1.4	1.2	-0.5	0.2	3	0.3
FLEAMHYKRDLSIEEQSE	2	164	181	4HB	-6	2									4.2	1.3	1	2	1.9	0.6	-1	3	-3	3	-2.1	2.5					1	0.4
FLEAMHYKRDLSIEEQSE	3	164	181	4HB	-3	2					2.5	3.1					2	1	1.6	0.6	1	1	1	1	-2.9	1.2					2.1	0.7
FLEAMHYKRDLSIEEQSEC	2	164	182	4HB											0.9	0.8	-3	4					-2	7
FLEAMHYKRDLSIEEQSEC	3	164	182	4HB	-1	1											1	1	0.5	1.2	1	1	1	2	-0.9	1.7			1.1	1.1	1.8	1.5
FLEAMHYKRDLSIEEQSECTQD	3	164	185	4HB	-2	2									0.1	0.7	2	1			3	1	3	2
FLEAMHYKRDLSIEEQSECTQDF	3	164	186	4HB	-7	7									2.9	1.2					-3	2
EAMHYKRDLSIE	2	166	177	4HB	-3	3	-3.5	17.7	-1.7	3.5	-1.5	2.9	1.2	2.9	-0.6	3.2	2	2	-1.3	0.6	-2	1	-4	2					1.3	0.6	-0.3	1.3
EAMHYKRDLSIEE	2	166	178	4HB	0	1	0.4	0.2	-2.5	1.7	-2	0.5	1.2	0.4	1.2	1.5	4	1	2.5	0.6	1	2	0	1	-2.8	0.6	1	1.7	0.5	0.4	1.9	0.9
EAMHYKRDLSIEEQSECTQDF	3	166	186	4HB	-7	3											-1	2			-3	4	-3	3							-0.1	1.1
MHYKRDLSIEE	2	168	178	4HB	-1	1	4.8	3.9	-0.8	2.7	0.5	2.5	2.2	2.6			0	1	1.4	0.8	-1	3	-2	2	-0.8	1.4	-1.4	2.6	2.7	1.7	-1.1	1.5
HYKRDLSIE	2	169	177	4HB	1	2	1.7	0.6	-0.9	1.8	0.2	1	0.6	0.6			-2	3	-0.9	0.9	-3	3	-2	4	-0.7	0.8			-1.4	1.4	1.2	0.7
HYKRDLSIEE	2	169	178	4HB	0	2	10.1	0.6	7.4	1.6	8.1	0.7	1.9	1.1			-1	1	-1.9	0.9	-3	2	-3	1	-6	2.1	1.6	1.8	-1	0.5	-1.3	0.5
EQSECTQDF	1	178	186	4HB	-3	2	0.7	5	1.1	5	-0.1	5	-1.6	5	-4.6	1.3	0	3	-1.8	0.7	1	2	2	2
QSECTQDF	1	179	186	4HB	-2	1	11.7	1.3	2.2	1.2	1.7	1	0.4	1.1	-3.8	1	0	0	-1.3	0.4	1	1	1	1	0.3	0.3			-0.3	0.3	-0.6	0.7
CTQDF	1	182	186	4HB	-5	3	10.4	1.3	4.4	0.1	3.3	0.4	2.2	0.2	1.3	1.5	1	1	-1.2	0.5	1	1	1	1	0.3	0.7			0.4	0.2	-0.7	0.6
FYQNVAE	1	186	192	4HB	0	2	12.7	1	4	0.7	3.2	0.8	0.8	0.8			2	2	-2.1	0.4	2	1	3	1			-2	1.9
FYQNVAERMQTRGKVPPERVEKIMDQIEKYIM	3	186	217	4HB	-6	1													-1.7	1.2									0.6	1.1	0.6	0.9
YQNVAE	1	187	192	4HB	-6	3	12.9	1.3	0.6	0.5	-0.9	0.5	-2	0.6			1	1	-1	0.6	1	1	1	1	0.1	0.8	-0.7	1.6	-0.2	0.6	-1.2	0.5
YQNVAERM	2	187	194	4HB	-10	2	10.4	0.8	-2.3	0.7	-4.9	1.1	-4.6	1.3			-6	3	-1.4	0.7	1	3	-3	3			-2.2	3.3			-1	1.4
YQNVAERMQTRGKVPPERVEKIMDQIEKYIM	3	187	217	4HB	-4	1			3.3	2.4	3.3	1.9			-2.3	0.3	-2	1	-1.7	0.5	1	3	-2	2	-2.4	0.3			-0.7	0.2	-1.5	0.3
ERMQTRGKVPPERVEKIMD	3	192	210	4HB			12.7	5.4	2.8	1.7	0.6	1.8	-1	1.7
ERMQTRGKVPPERVEKIMDQ	3	192	211	4HB					-2.3	3.7
RMQTRGKVPPERVEKIMDQ	3	193	211	4HB	-5	1	6.7	1.8	2.6	2.1	-0.3	1.9	0.7	1.8			-2	1	-0.6	0.5	-2	1	-2	1	-3.1	0.9	-0.7	1.9	1.5	0.6	0.1	0.7
RMQTRGKVPPERVEKIMDQIE	3	193	213	4HB	-3	1	9.2	1.1	5.1	1.4	2.9	1.4	0.2	1.2			-4	1	-2.8	1	2	1	1	1	-1.8	0.7			0.1	0.7	-3.1	0.2
QIEKYIM	1	211	217	4HB	1	2	2.9	1.4	2.1	1.3	1.4	1.3	1	1.6			0	1			1	2	-1	1	0.4	0.6	0.5	3.7	-0.9	0.5	-1.5	0.3
QIEKYIM	2	211	217	4HB	0	1	5.4	0.5	3.3	0.5	2.9	0.4	2.3	0.7			1	0	-1.1	0.8	-1	1	0	1	0.3	0.6	-0.4	1.2	1.1	0.7	-0.3	0.7
IEKYIM	1	212	217	4HB	-1	1	-1.8	1.3	-3.6	1.3	-4.7	1.3	-4.4	1.3	-10.6	0	1	1			1	1	-2	2
IEKYIM	2	212	217	4HB	-1	1	4.9	0.6	4.2	0.6	2.6	0.6	1.2	0.6			0	1	-1	0.6	-1	0	0	0	0.3	0.5	-0.2	1.1	0.2	0.4	-1.1	0.6
IMTRL	1	216	220	4HB	-16	5	15.1	1.3	9	0.8	-2.2	1	-2.2	1.1			-3	3			4	4	7	8
TRLYKYVF	2	218	225	4HB	-1	1									0.8	0.6	-1	1	-1	0.7	-2	2	1	2	-1.2	1.6			5.4	1.3	-1.2	0.7
TRLYKYVFCPETTDDEKKDLAIQKRIRALHWVTPQM	4	218	253												-1.3	1
YKYVF	1	221	225		-5	1	3.8	1.2	0	0.9	0.1	0.9	-1.2	1	1.1	1.9	1	1	-0.3	0.3	0	1	1	1	0.3	0.5	0.4	0.8	0.3	0.5	-0.7	0.6
YKYVFCPETTDDEKKDLAIQKRIRALHWVTPQM	3	221	253		0	1									-1.4	1	0	1	-1.6	0.4	-2	0	-2	1	0.1	0.6			3	0.4	-1	0.4
YKYVFCPETTDDEKKDLAIQKRIRALHWVTPQM	4	221	253		-6	0	9	1.9	0.1	2	3.4	1.8	-0.4	1.8	-1.2	1	-2	1	-1.7	0.2	-2	1	-2	1	0.2	0.3	2	1.3	2.4	0.2	-1.5	0.3
CPETTDDEKKDLA	2	226	238				8.9	1.8	0.2	1.9	5.3	1.6	5.5	1.7					-6.9	2.8					-2.4	3.7	-2.6	2.3	6.9	2.5
CPETTDDEKKDLAIQKRIRALHWVTPQM	3	226	253		-6	1	7.3	1.3	-0.9	0.9	2.3	0.9	0	0.9	1.5	0.4	-2	0	-1.6	0.3	-2	1	-2	0	0.1	0.4	0.4	0.4	2.6	0.1	-1.2	0.2
LHWVTPQM	2	246	253	Vps9	-5	4											0	5	1	2	-14	7	1	16
LCVPVNE	1	254	260	Vps9	5	2
LCVPVNEEIPEVSD	2	254	267	Vps9	-6	1											-2	1	-0.8	1	-3	2	-1	2	0.6	0.6			1	1.3	-4.4	0.7
LCVPVNEEIPEVSDM	2	254	268	Vps9	-7	1	15.2	1.5	4	1.1	6	0.3	-1.1	0.4	-6.4	3.1	-5	1	-4.4	0.4	1	1	0	1	-0.4	0.5	1.5	1.4	1.8	0.2	-3.2	0.3
MVVKAITD	1	268	275	Vps9	1	1	3	0.5	1.4	0.5	1.4	0.5	0.1	0.5	0.9	0.6	1	1			0	1	1	1	-3.3	0.9
MVVKAITD	2	268	275	Vps9	0	0	3.2	1.1	-1.8	0.7	-1.9	0.7	-3.4	0.8			0	1	-0.6	0.4	1	0	1	0	0.5	0.3	0.4	0.9	-0.7	0.6	-0.8	0.7
VVKAIT	1	269	274	Vps9	-6	5					3.2	0.7					0	2			-1	2	3	2			-2.3	1.5
VVKAITD	1	269	275	Vps9	-7	2	2.6	0.2	1.9	0.1	1.6	0.1	1.4	0.2			1	0	0.9	0.6	0	0	0	0	-0.1	0.2			0.2	0.2	0.2	0.1
VVKAITDIIE	2	269	278	Vps9	1	1					-4.9	11.8					2	1			2	1	3	1
KAITD	1	271	275	Vps9	4	4	1.6	2.1	2.6	1.1	2.2	1.2	2.1	1.2			8	1			1	2	6	1
IIEMDSKRVPRDKL	2	276	289	Vps9											-1.9	1.3									-6.1	1.7
IIEMDSKRVPRDKLAC	2	276	291	Vps9	-4	1	5.7	1.2	1.5	1.5	0.5	1	-5	0.6	-1.4	1.7	-1	1			0	3	0	2
IIEMDSKRVPRDKLAC	3	276	291	Vps9	-5	0	5.2	1	0.9	1	-1.4	0.6	-1.3	0.5	-0.9	1.6	-2	0	-0.2	0.3	1	0	0	0	-1.5	0.6	3	2.7	3.6	0.5	-1.1	0.7
IIEMDSKRVPRDKLACITKCSKHIFNA	4	276	302	Vps9	-1	1									-2.6	0.5	-3	2			1	1	0	1					3.3	1.1	0.5	1.5
MDSKRVPRDKLAC	2	279	291	Vps9	-5	1	6.4	0.7	1.9	0.6	-1.2	0.5	-0.8	0.8			-1	1	1.1	0.2	-1	0	0	1	-1.3	0.5	0.9	2.9	4.4	0.2	-0.9	0.5
DSKRVPRDKL	2	280	289	Vps9	-4	6	6.9	1.3	2.5	1.2	-1.4	1.1	-0.4	1.1			-1	1	1.5	0.5	-1	1	1	1	-1.7	0.6			7.1	0.5	-1.3	0.5
DSKRVPRDKLAC	2	280	291	Vps9	-8	0	7.9	0.8	2.3	0.8	-0.5	0.7	-0.3	0.6	-10.5	2.7	-1	0	0.2	0.4	0	0	1	0	-1.3	0.5	-1.8	1.3	5.8	0.3	-1.3	0.4
DSKRVPRDKLAC	3	280	291	Vps9	-9	1	9.1	1	3.1	0.8	0.1	0.6	0.2	0.5			-1	1	0.4	0.8	0	0	1	0	-1.4	0.5	-0.3	0.4	6	0.3	-1.5	0.4
DSKRVPRDKLACITKCSKHIFNA	3	280	302	Vps9	1	2	5.1	1.3	1.3	1.3	0.4	1.2	-1.3	1.3	-1.9	0.6	1	1	-0.2	0.3	1	2	2	1					1.8	0.7	-0.7	0.5
ACITKCSKHIFNA	3	290	302	Vps9	-3	0	3.5	0.8	0.4	0.3	0.1	0.3	-0.4	0.2	-1	0.7	0	0	-0.6	0.2	0	0	1	0	0.2	0.3	-1.3	0.4	0.2	0.4	-0.4	0.3
ACITKCSKHIFNAIKITKNEPASADDFL	3	290	317	Vps9	-4	1									-4.2	0.3	-1	1	-1.2	0.6	2	1	1	1	-0.7	0.9					-0.6	0.7
ACITKCSKHIFNAIKITKNEPASADDFLPTL	3	290	320	Vps9	0	3									-4	1.2													1.2	0.7	-2.4	0.7
ITKCSKHIFNA	2	292	302	Vps9	-6	1	5.4	0.5	1.7	0.3	1.4	0.3	-0.6	0.4	0	1.1	0	0	-1.3	0.2	0	0	0	0	-0.3	0.2	-1.6	0.3	0.3	0.2	-0.7	0.2
ITKCSKHIFNA	3	292	302	Vps9	-5	1	5	0.4	1.5	0.2	0.9	0.3	-0.5	0.4			0	0	-1.4	0.5	0	0	0	0	-0.6	0.4	-1.9	0.2	0.8	0.5	-0.9	0.3
ITKCSKHIFNAIKITKNEPASADDFL	3	292	317	Vps9	-4	1	3.8	0.6	-0.4	0.7	-0.6	0.6	-2.9	0.6	-2.2	1	-1	0	-2.3	0.4	2	0	2	0	-1.5	0.4			0.6	0.3	-1.5	0.3
ITKCSKHIFNAIKITKNEPASADDFLPTL	3	292	320	Vps9	-5	1	7.4	0.5	3.5	1	2.6	1.4	-1.2	0.6	-2.1	0.3	-2	0	-1.8	0.2	1	0	1	0	-0.3	2			1.1	0.1	0.2	0.7
ITKCSKHIFNAIKITKNEPASADDFLPTLIY	3	292	322	Vps9											-2.2	0.6
KCSKHIFNA	2	294	302	Vps9	-1	3	4.6	0.8	1.9	0.8	0.7	0.9	2.3	0.8			1	3			-1	3	1	4
IKITKNEPASA	2	303	313	Vps9	-6	5					5.4	2.6					1	2			1	5	-1	5			1.4	3.5	1	0.8	-1.8	0.6
IKITKNEPASAD	2	303	314	Vps9	0	3	10.5	2.8	5	2.8	5.4	2.7	5.2	2.8			-1	2	-1.8	0.6	0	2	3	2					1.8	1.2	-0.9	0.2
IKITKNEPASADD	2	303	315	Vps9	-2	2	12.1	2.5	6.1	2.6	5.8	2.5	6.7	2.4			1	2	-0.9	0.7	-1	1	-1	2	-1.7	2	-0.8	1.4	2.9	1.2	0.2	0.5
IKITKNEPASADDFL	2	303	317	Vps9	-5	0	12.8	1	5.3	1.3	3.6	0.9	-3.5	0.9	-3.7	3.3	-2	1	-3.7	0.6	4	1	3	1	-2.1	0.7	-4.6	0.3	1.1	0.5	-4	0.6
IKITKNEPASADDFL	3	303	317	Vps9	-5	0	8.8	3.3	2	3.4	0.2	3.3	-3.7	3.2			-1	1	-2.8	0.3	4	1	3	1	-2.2	0.5	-3.8	0.7	1.4	0.3	-2.1	0.6
IKITKNEPASADDFLPTL	2	303	320	Vps9	-5	0	11.2	2.5	3	3.2	3.7	2.5	-3.7	2.5	-10	2.1	-6	1	-4.9	0.4	3	1	1	1	-2.1	0.8	-5.1	0.8	1.4	0.3	-3.4	0.3
IKITKNEPASADDFLPTLIY	2	303	322	Vps9	-12	4									-7.1	1.2			-4.3	0.9					-1.2	0.8			1.1	0.9	-2.2	0.4
IKITKNEPASADDFLPTLIY	3	303	322	Vps9	-7	4													-5.8	0.7					-2.1	0.6			1.1	0.3	-3.3	1.5
PTLIY	1	318	322	Vps9	-1	1	4.5	0.6	3.8	0.4	3.3	0.4	2	0.4	0.8	0.7	1	0	-1.9	0.3	0	1	0	1	0.9	0.3	-0.5	1.7	0.5	0.4	-1.1	0.2
IYIVL	1	321	325	Vps9	0	1	4.7	1.2	4.5	1.2	4.2	1.1	1.1	1.3	0.2	0.4	0	0	-0.7	0.3	1	1	1	0	0.4	0.4			-0.3	0.4	-0.6	0.5
IVLKGNPPRL	2	323	332	Vps9	-1	1	7.1	1.1	1.7	0.6	2.4	0.8	1.1	0.9	1	1.7	-1	1	-1.3	0.9	-1	1	-2	2	-1.1	0.9			0.8	0.6	-1.8	0.5
IVLKGNPPRLQS	2	323	334	Vps9	-6	1	7.5	0.9	0.4	0.6	1.4	0.6	0.2	0.6	1.1	1.3	0	1	-0.8	0.2	-2	1	-1	1	-0.1	0.4	0.3	2	1.3	0.2	-0.4	0.3
IVLKGNPPRLQS	3	323	334	Vps9	-11	1			1.5	0.4	2.4	0.4	1.1	0.4	3.2	2.2	0	0	-0.8	0.2	-1	0	-1	0	0.1	0.4	0.5	0.8	1.1	0.2	-0.8	0.4
IVLKGNPPRLQSNIQY	2	323	338	Vps9	-6	2	9.2	1.1	-0.6	0.3	1	0.3	-1.7	0.6	-0.5	1.6	-1	0	-2	0.4	-1	1	0	1	-0.9	0.4			0.3	0.3	-1.4	0.4
KGNPPRL	1	326	332	Vps9							8.3	3.3
KGNPPRLQS	1	326	334	Vps9			5.2	2	-1	2	1.4	2.1	2.3	2
KGNPPRLQS	2	326	334	Vps9	-5	1	9.9	1.1	1.9	0.6	3.6	0.7	2.3	0.6			-1	0	-0.9	0.5	-2	0	-2	0	-0.5	0.5	1.3	1	2.6	0.2	-0.2	0.4
KGNPPRLQSN	2	326	335	Vps9	6	1	6.6	1	-0.6	0.8	0.9	1	1.4	1.3			4	2	1.6	0.8	2	2	-1	2	-1.5	1.8			2.1	0.3	0.4	0.6
KGNPPRLQSNIQY	2	326	338	Vps9	-7	1	7.2	0.8	-0.3	0.3	1.1	0.3	-0.4	0.4	0.3	0.9	0	0	-1	0.4	-1	1	-1	1	-0.2	0.6	0.5	0.9	1.1	0.4	-0.8	0.4
QSNIQY	1	333	338	Vps9			7.6	0.4	2.2	0.4	2.7	0.4	-1.3	0.8			2	0	-2.8	0.2	0	2	3	1	0	0.5			0.9	0.5	-0.8	0.2
NIQYITRFCNPSRL	2	335	348	Vps9	-8	2									-9.8	2.6			0.4	1.7					0	2.4					-1.4	0.4
ITRFCNPSRL	1	339	348	Vps9											-12.7	1.9
ITRFCNPSRL	2	339	348	Vps9	-14	1	9.9	1.2	7.5	1.5	-6.1	1	-8.8	0.9	-10.9	2.2	0	1	-1.3	0.4	14	0	15	0	-3.3	0.4	-3.1	0.5	1.6	0.3	-0.8	0.5
ITRFCNPSRL	3	339	348	Vps9	-14	0	10.1	1.7	7.1	2.1	-6	1.6	-8.9	1.5			0	1	-1.7	0.2	15	0	15	0	-2.7	0.6	-2.7	0.8	1.9	0.2	-0.7	0.4
ITRFCNPSRLMTGEDGYY	2	339	356	Vps9	-17	6									-13.4	3.4	2	2					2	3					-0.4	1.2
ITRFCNPSRLMTGEDGYY	3	339	356	Vps9	-20	2															9	2
TRFCNPSRL	2	340	348	Vps9
CNPSRL	1	343	348	Vps9	-25	8			13.8	3.5	-13.5	2.9							2.8	2	32	3	32	3					4.3	3.2	-1.5	1.8
MTGEDGY	1	349	355	Vps9:Rab5 Binding Site			14.5	3.2	14	4.1	-2.6	1.2	-0.9	3.7	-12.2	1.6	5	5	-0.5	2.8	18	5	22	4	-3.9	2.8
MTGEDGYY	1	349	356	Vps9:Rab5 Binding Site	-14	1	11.7	1.9	10	2.2	-6.8	1.9	-7.8	1.8			1	1	-0.2	0.6	18	0	18	0	-3.9	0.8	-6.8	1.9	-0.2	0.6	0.1	0.6
IEKLDA	1	367	372	Vps9:Rab5 Binding Site	-10	2	10.2	1.9	4.7	1.7	-1.4	1.7	-4	1.8			0	1	1.2	2.1	5	2	5	1	-2.9	0.6	-5.7	2.3	0.8	0.5	-0.8	0.9
IEKLDAQSL	1	367	375	Vps9:Rab5 Binding Site											-6.2	1.8	-13	2			13	3	11	2
IEKLDAQSL	2	367	375	Vps9:Rab5 Binding Site	-3	1	3.6	1.3	7.5	1.2	-5.5	0.9	-9.1	1	-7.9	1.8	-8	1	-2	0.8	5	2	8	1	-2.2	0.6	-7.9	3	2.6	1.2	-0.1	1
IEKLDAQSLNL	1	367	377	Vps9:Rab5 Binding Site	-5	3											-11	2			7	1	11	1
IEKLDAQSLNL	2	367	377	Vps9:Rab5 Binding Site	-7	1	10.2	2.6	12.6	2.6	-2	2.5	-6.8	2.4			-11	1	-2.4	0.5	8	1	10	1	-3.7	1.2	-4.3	0.8	2	0.2	-1.4	1.3
IEKLDAQSLNLSQED	2	367	381	Vps9:Rab5 Binding Site
DAQSLNL	1	371	377	Vps9:Rab5 Binding Site			0.7	6.6	15.4	6.6	-10.1	6.6	-17.3	6.6			-19	1			5	2	10	2	-4	1.7
QSLNL	1	373	377	Vps9:Rab5 Binding Site	-13	3	1.7	2.6	7.7	2.2	-28.2	2.4	-23.8	2.9	-12.4	5.2	-24	3	-3.2	0.7	13	1	22	1					6.4	1.1
NLSQEDF	1	376	382	Vps9:Rab5 Binding Site	-7	5
SQEDF	1	378	382	Vps9:Rab5 Binding Site	7	2	-2.9	2	8.8	1.8	-1.8	1.8	-9.5	1.8	-3	4.3	-10	1	-0.5	0.3	4	1	5	1	-1.7	0.8			1.5	0.4	0.2	0.6
SQEDFDRY	2	378	385	Vps9:Rab5 Binding Site	4	2	-9.6	1.7	9.6	0.9	-9.2	1.5	-15	0.9			-18	1	-1.9	0.9	2	1	8	1	1.1	1.2	-6.3	1	1.8	0.7	-2.6	0.6
SQEDFDRYMSGQTSPRKQESENWSPDACL	3	378	406	Vps9:Rab5 Binding Site											-9.2	2.7					1	2
DRYMSGQTSPRKQESEN	2	383	399	Rabaptin Binding Site					-0.7	2	-4.9	2.4	-3.6	2					1.1	0.9	4	5							1	0.7
DRYMSGQTSPRKQESENWSPDACL	3	383	406	Rabaptin Binding Site											-6.1	5.7	-10	1	-6.7	0.6	-1	1	0	1	0.4	0.7	-2.7	0.9	1.1	0.3	-4.8	0.3
MSGQTSPRKQESENWSPDACL	2	386	406	Rabaptin Binding Site													-4	2	-4.3	1.1	-1	1	-1	1			-1.5	1.7	1.2	1.6	-3.8	1.5
WSPDACL	1	400	406	Rabaptin Binding Site													-9	1	-5.2	1.5	3	3	0	2	6.2	1.9
GVKQMYKNLDL	2	407	417	Rabaptin Binding Site											-39.2	1.2	-33	1	-36.9	0.7	0	2	12	1	8.1	2	1.6	2.3	13	0.4	-33.8	0.9
GVKQMYKNLDLL	2	407	418	Rabaptin Binding Site											-47.8	1.8	-42	1	-45.9	1.2	1	3	14	1	8	2.1	-3.2	2.6	11.5	0.8	-43.6	1.4
LSQLNERQERIMNEAKKLEKDLIDWTDGIAKE	4	418	449	Rabaptin Binding Site											-65.7	5.4			-124.2	0.7	-3	1
LSQLNERQERIMNEAKKLEKDLIDWTDGIAKE	5	418	449	Rabaptin Binding Site					-5.7	1.8			-122.1	0.7					-125.4	1.2	0	1									-90.9	4.4
NERQERIMNE	2	422	431	Rabaptin Binding Site					10.2	4.2			-110	4.2			-90	2	-95.5	2	-1	1	37	2	30.9	0.9	-0.2	3	25.1	0.9	-97.6	1.3
NERQERIMNEAKKLEKDLID	4	422	441	Rabaptin Binding Site					7.2	2.6			-123.5	2.7			-87	5	-85.9	1.3	0	1	41	5	18	1.8	0.5	1.2	18	2.9	-103.1	3.7
NERQERIMNEAKKLEKDLIDWTDGIAKE	3	422	449	Rabaptin Binding Site															-129.6	1.3	1	1					0.5	0.5
NERQERIMNEAKKLEKDLIDWTDGIAKE	4	422	449	Rabaptin Binding Site					-4.5	2.8			-124.3	1.1					-125.4	1	1	0					4.5	4	0.9	0.2	-114.7	2
NERQERIMNEAKKLEKDLIDWTDGIAKE	5	422	449	Rabaptin Binding Site					11.7	7.8			-108.5	7.2			-87	1			0	0	35	1	24.4	1.5	0.2	1.3
NERQERIMNEAKKLEKDLIDWTDGIAKEVQD	3	422	452	Rabaptin Binding Site
AKKLEKDLID	2	432	441	Rabaptin Binding Site															-92	2.6	-1	2	12	6	20.1	1.7			7	2	-98.2	3.1
AKKLEKDLIDWTDGIA	2	432	447	Rabaptin Binding Site															-109.7	0.9					13	3.8			0.8	1.2	-99.8	2.3
AKKLEKDLIDWTDGIAKE	2	432	449	Rabaptin Binding Site													-91	1			-1	1	13	3			0.2	1.8	2.1	1.1	-104.6	1.5
AKKLEKDLIDWTDGIAKE	3	432	449	Rabaptin Binding Site													-78	1			0	1	29	1			0.3	1.5	5.8	3	-104	1.5
VQDIVEKYPLE	2	450	460	Rabaptin Binding Site					10.4	2.8			-58.8	2.7	-43.2	1.6	-59	0	-61.9	0.5	-2	1	14	0			0.8	2			-60.1	1.2
VQDIVEKYPLEIRPPNQSVA	3	450	469	Rabaptin Binding Site					0.5	1.6			-36	1.5	-35	3.3	-25	1	-26.3	0.8	1	1	14	1					8	0.5	-27.5	1.3
DIVEKYPLE	2	452	460	Rabaptin Binding Site					1	2.6			-55.3	2.1			-36	2	-42.5	1.6	0	2	23	2	14.4	2.4			10	2.1	-45.3	1.6
IVEKYPLE	1	453	460	Rabaptin Binding Site					9.9	3.9			-38	3.8			-31	3			-1	2	15	1			1.5	3.3
IVEKYPLE	2	453	460	Rabaptin Binding Site					16.4	4.1			-33.2	4			-35	2			1	1	17	1			3.4	1.3	8.8	0.6	-38.4	1.4
IVEKYPLEIRPPNQSVA	2	453	469						3.5	1.7			-18.8	1.6	-14.6	3	-13	1	-14.4	0.7	-1	1	7	1	6.2	0.8			5.6	0.7	-14.3	0.8
IRPPNQSV	1	461	468						11.4	3.5			15.1	2.7			6	3	1.5	2.1	3	2	4	3	1.2	1.4			-0.6	1	-20.3	29.2
IRPPNQSV	2	461	468						13.2	3.2			16.1	2.8			4	1	1	1.1	0	1	1	1	1.2	1.5	-0.2	2.1	1.1	1.1	4.8	0.9
IRPPNQSVA	1	461	469						5.4	3.3			10.3	2.9			2	3	1.5	0.5	1	1	0	1	-0.9	0.5			-0.3	1.7	-0.1	1.3
IRPPNQSVA	2	461	469						13.1	5.9			13.6	5.2			0	1	1.4	1.7	1	1	0	0	0.8	1.9	3.3	4.2	0.6	2.3	2.4	2.7
IRPPNQSVAA	2	461	470						10.4	2.4			8.9	2.1			-3	1	1.5	0.8	-1	1	2	1	4.7	4.1			1.2	1.8	-2.9	1.8
IRPPNQSVAAIDSE	2	461	474						8.8	1.5			4.9	2.3	-2.2	5	-6	2
AIDSE	1	470	474						11	2.8			11.2	2.8			-3	4			0	3	0	4	-0.9	1
AIDSENVENDKLPPPLQPQVY	2	470	490						1.6	1.7			-5	2.1			-5	1			-4	2	-2	3			-0.7	4	-0.3	1.7	-4	1.2
NVENDKLPPPLQPQVY	2	475	490						0.1	0.7			-3.8	1.4			-2	1	-2.4	0.5			-1	1	0	1.4	-1.5	1.5	0.3	0.4	1.3	0.5

## Sheet: Manuscript Figure4
					Fig4B		Fig4A		Fig4D		Fig4C
													2016-05-01
Sequence	Charge	Start	End	Features	i78 vs i141	Stdev	i78 vs i78i87	Stdev	i78i87 vs i139i87	Stdev	i78i87 vs i137i87	Stdev	Rabex + Rab5o	Stdev
SLKSERRGIHVDQSEL	2	2	17		0	0.9	0	1	0	1.1
SLKSERRGIHVDQSEL	3	2	17		0	1	0	0.7	0	0.6
KSERRGIHVDQSEL	2	4	17		0	1.7	0	1.4	0	0.9
KSERRGIHVDQSEL	3	4	17		0	1.7	0	1.4	0	0.4
KSERRGIHVDQSELL	2	4	18						0	2.1
LCKKGCGY	1	18	25	ZnF UBD	-19.6	4.3	-21.4	6.5
LCKKGCGY	2	18	25	ZnF UBD	-18.2	2.5	-24.7	2.3	0	1.2
LCKKGCGYYGNPAWQG	2	18	33	ZnF UBD	-29.3	4.1	-38.2	3.9	0	1.6
LCKKGCGYYGNPAWQGF	2	18	34	ZnF UBD	-31.1	1.9	-44	1.6	0	0.8			0	3.7
LCKKGCGYYGNPAWQGF	3	18	34	ZnF UBD	-30.2	2.9	-40.5	2.8	0	0.7			0	2.3
LCKKGCGYYGNPAWQGFCSKC	3	18	38	ZnF UBD	-38.2	3.6	-46.5	3.6	0	1.2
YGNPAWQGF	1	26	34	ZnF UBD
FCSKC	1	34	38	ZnF UBD	-37	4	-45.6	3.8	-0.4	0.8
CSKCWREEYHKARQKQIQED	3	35	54	MIU UBD	-5.8	1.2	-5.4	0.9	0.2	0.5
WREEYHKARQKQIQE	2	39	53	MIU UBD	0	1.7	0	1.3	0	1.2
WREEYHKARQKQIQE	3	39	53	MIU UBD	0	2.8	0	2	0.1	0.7
WREEYHKARQKQIQED	2	39	54	MIU UBD	0	2.1	0	1.7	-0.3	0.3
WREEYHKARQKQIQED	3	39	54	MIU UBD	0	1.9	0	1.5	0.1	0.6			0	1.4
WREEYHKARQKQIQED	4	39	54	MIU UBD	0	2.1	0	1.6	0.2	0.4			0	2
WREEYHKARQKQIQEDWE	3	39	56	MIU UBD	0	1.5	0	1.5	0	0.6
WREEYHKARQKQIQEDWEL	3	39	57	MIU UBD	0	2.6	0	2.1	-0.1	1
LAERL	1	57	61		0	6.7
LAERLQREEEEA	2	57	68		0	1.8	0	1.4	0	0.5	0	1
AERLQREEE	2	58	66		0	3.3	0	3	-0.3	1.3	0	4
AERLQREEEEA	2	58	68		0	1.7					0	0	0.2	4.6
AERLQREEEEA	3	58	68		0	2.1	0	1.7	0	0.4	0	2	0	7.1
AERLQREEEEAF	2	58	69		0	4.1			0	1.5
FASSQSSQGAQSLT	2	69	82		0	4.4	0	3.7			0	1
FSKFEEKKTNEKTRKVTTVKKFFSA	4	83	107	Linker	0	2.3	0	2.2
FSKFEEKKTNEKTRKVTTVKKFFSASSRVGAKKAEIQE	4	83	120	Linker	11.2	7.2	26.4	7.1			0	1
FSKFEEKKTNEKTRKVTTVKKFFSASSRVGAKKAEIQE	5	83	120	Linker	6.1	4.6	22.3	3.9			0	0
FSKFEEKKTNEKTRKVTTVKKFFSASSRVGAKKAEIQE	6	83	120	Linker	11.2	4.7	27.9	4.7			0	1
EEKKTNEKTRKVTTVKKFFSASSRVGAKKAEIQE	4	87	120	Linker	10.9	2.7	24.9	2.3			0	1
EEKKTNEKTRKVTTVKKFFSASSRVGAKKAEIQE	5	87	120	Linker	8.1	3.2	17.5	3.6			0	2
SASSRVGAKKAEIQEAKAPSPSINRQTSIETDRVSKE	5	106	142		0	1.5	-0.3	0.5			0	1
SASSRVGAKKAEIQEAKAPSPSINRQTSIETDRVSKE	6	106	142		0	0.5	0	0.2			0	1
EAKAPSPSINRQTSIET	2	120	136		0	1	0	1.6
EAKAPSPSINRQTSIETDRVSKE	4	120	142		0	0.7	0	1.5			0	6	0	5.3
AKAPSPSINRQTSIE	2	121	135		0	7.4	0	6.3
AKAPSPSINRQTSIET	2	121	136		0	7.1	0	6	0	1	0	1	0	0.9
DRVSKEF	1	137	143	4HB					0	2.2
DRVSKEF	2	137	143	4HB	0	3.7	0	3.8	0	1.8	0	2	0	2.6
IEFLKTFHKTGQEIYKQTKL	3	144	163	4HB					-5.4	1.2	0	1
IEFLKTFHKTGQEIYKQTKL	4	144	163	4HB					-5.2	1.7	0	1
LKTFHKTGQE	2	147	156	4HB	0	2.8	0	2.8	0	0.5	0	3	0	2.3
LKTFHKTGQE	3	147	156	4HB	0	4.4	0	4.3	0	2.9
LKTFHKTGQEIYKQTKL	2	147	163	4HB	0	0.9	0	1	-5.5	1.3	0	1	-0.2	0.6
LKTFHKTGQEIYKQTKL	3	147	163	4HB	0	1	0	1.5	-4.1	0.5	0	0	-0.2	0.5
LKTFHKTGQEIYKQTKLFL	2	147	165	4HB	0	3.1	0	3.1	-5.1	1.4	0	1
LKTFHKTGQEIYKQTKLFL	3	147	165	4HB	0	0.5	0	0.9	-3.6	0.6	0	0
KTFHKTGQEIYKQTKL	3	148	163	4HB
IYKQTKL	2	157	163	4HB	0	0.7	0	0.8	0	1.3	0	2	0	2.2
FLEAM	1	164	168	4HB	0	0.4	0	0.4			0	1	0	1.8
FLEAMHYKRDLSIE	2	164	177	4HB	0	1.1	0	1	0	0.8	0	1	0	1.7
FLEAMHYKRDLSIE	3	164	177	4HB	0	1.7	0	1.7	0	0.5	0	1	0	2.3
FLEAMHYKRDLSIEE	2	164	178	4HB	0	1.6	0	1.5	0	0.4	0	1	0	1.5
FLEAMHYKRDLSIEE	3	164	178	4HB					0	0.5	0	1	0	1.2
FLEAMHYKRDLSIEEQSE	2	164	181	4HB					0	2.5	0	3
FLEAMHYKRDLSIEEQSE	3	164	181	4HB	0	3.1			0	1.2	0	1
FLEAMHYKRDLSIEEQSEC	3	164	182	4HB					0	1.7	0	1
EAMHYKRDLSIE	2	166	177	4HB	0	2.9	0	2.9			0	1
EAMHYKRDLSIEE	2	166	178	4HB	0	0.5	0	0.4	0	0.6	0	2	0	1.7
EAMHYKRDLSIEEQSECTQDF	3	166	186	4HB							0	4
MHYKRDLSIEE	2	168	178	4HB	0	2.5	0	2.6	0	1.4	0	3	0	2.6
HYKRDLSIE	2	169	177	4HB	0	1	0	0.6	0	0.8	0	3
HYKRDLSIEE	2	169	178	4HB	0	0.7	0	1.1	0	2.1	0	2	0	1.8
EQSECTQDF	1	178	186	4HB	0	5	0	5			0	2
QSECTQDF	1	179	186	4HB	0	1	0	1.1	0.3	0.3	0	1
CTQDF	1	182	186	4HB	0	0.4	0	0.2	0.3	0.7	0	1
FYQNVAE	1	186	192	4HB	0	0.8	0	0.8			0	1	0	1.9
YQNVAE	1	187	192	4HB	0	0.5	0	0.6	0.1	0.8	0	1	0	1.6
YQNVAERM	2	187	194	4HB	0	1.1	0	1.3			0	3	0	3.3
YQNVAERMQTRGKVPPERVEKIMDQIEKYIM	3	187	217	4HB	0	1.9			0	0.3	0	3
ERMQTRGKVPPERVEKIMD	3	192	210	4HB	0	1.8	0	1.7
RMQTRGKVPPERVEKIMDQ	3	193	211	4HB	0	1.9	0	1.8	0	0.9	0	1	0	1.9
RMQTRGKVPPERVEKIMDQIE	3	193	213	4HB	0	1.4	0	1.2	0	0.7	0	1
QIEKYIM	1	211	217	4HB	0	1.3	0	1.6	0.4	0.6	0	2	0	3.7
QIEKYIM	2	211	217	4HB	0	0.4	0	0.7	0.3	0.6	0	1	-0.4	1.2
IEKYIM	1	212	217	4HB	0	1.3	0	1.3			0	1
IEKYIM	2	212	217	4HB	0	0.6	0	0.6	0.3	0.5	0	0	-0.2	1.1
IMTRL	1	216	220	4HB	0	1	0	1.1			0	4
TRLYKYVF	2	218	225	4HB					0	1.6	0	2
YKYVF	1	221	225		0	0.9	0	1	0.3	0.5	0	1	0	0.8
YKYVFCPETTDDEKKDLAIQKRIRALHWVTPQM	3	221	253						0.1	0.6	0	0
YKYVFCPETTDDEKKDLAIQKRIRALHWVTPQM	4	221	253		0	1.8	0	1.8	0.2	0.3	0	1	0	1.3
CPETTDDEKKDLA	2	226	238		0	1.6	0	1.7	0	3.7			0	2.3
CPETTDDEKKDLAIQKRIRALHWVTPQM	3	226	253		0	0.9	0	0.9	0	0.4	0	1	0	0.4
LCVPVNEEIPEVSD	2	254	267	Vps9					0	0.6	0	2
LCVPVNEEIPEVSDM	2	254	268	Vps9	0	0.3	0	0.4	0	0.5	0	1	0	1.4
MVVKAITD	1	268	275	Vps9	0	0.5	0	0.5	0	0.9	0	1
MVVKAITD	2	268	275	Vps9	0	0.7	0	0.8	0	0.3	0	0	0.4	0.9
VVKAIT	1	269	274	Vps9	0	0.7					0	2	0	1.5
VVKAITD	1	269	275	Vps9	0	0.1	0	0.2	-0.1	0.2	0	0
VVKAITDIIE	2	269	278	Vps9	0	11.8					0	1
KAITD	1	271	275	Vps9	0	1.2	0	1.2			0	2
IIEMDSKRVPRDKLAC	2	276	291	Vps9	0	1	0	0.6			0	3
IIEMDSKRVPRDKLAC	3	276	291	Vps9	0	0.6	0	0.5	0	0.6	0	0	0	2.7
MDSKRVPRDKLAC	2	279	291	Vps9	0	0.5	0	0.8	0	0.5	0	0	0	2.9
DSKRVPRDKL	2	280	289	Vps9	0	1.1	0	1.1	0	0.6	0	1
DSKRVPRDKLAC	2	280	291	Vps9	0	0.7	0	0.6	0	0.5	0	0	0	1.3
DSKRVPRDKLAC	3	280	291	Vps9	0	0.6	0	0.5	0	0.5	0	0	0	0.4
DSKRVPRDKLACITKCSKHIFNA	3	280	302	Vps9	0	1.2	0	1.3			0	2
ACITKCSKHIFNA	3	290	302	Vps9	0	0.3	0	0.2	0	0.3	0	0	0	0.4
ITKCSKHIFNA	2	292	302	Vps9	0	0.3	0	0.4	0	0.2	0	0	0	0.3
ITKCSKHIFNA	3	292	302	Vps9	0	0.3	0	0.4	0	0.4	0	0	0	0.2
ITKCSKHIFNAIKITKNEPASADDFL	3	292	317	Vps9	0	0.6	0	0.6	0	0.4	0	0
ITKCSKHIFNAIKITKNEPASADDFLPTL	3	292	320	Vps9	0	1.4	0	0.6	0	2	0	0
KCSKHIFNA	2	294	302	Vps9	0	0.9	0	0.8			0	3
IKITKNEPASA	2	303	313	Vps9	0	2.6					0	5	0	3.5
IKITKNEPASAD	2	303	314	Vps9	0	2.7	0	2.8			0	2
IKITKNEPASADD	2	303	315	Vps9	0	2.5	0	2.4	0	2	0	1	0	1.4
IKITKNEPASADDFL	2	303	317	Vps9	0	0.9	0	0.9	0	0.7	0	1	-4.6	0.3
IKITKNEPASADDFL	3	303	317	Vps9	0	3.3	0	3.2	0	0.5	0	1	-3.8	0.7
IKITKNEPASADDFLPTL	2	303	320	Vps9	0	2.5	0	2.5	0	0.8	0	1	-5.1	0.8
PTLIY	1	318	322	Vps9	0	0.4	0	0.4	0	0.3	0	1	0	1.7
IYIVL	1	321	325	Vps9	0	1.1	0	1.3	0	0.4	0	1
IVLKGNPPRL	2	323	332	Vps9	0	0.8	0	0.9	0	0.9	0	1
IVLKGNPPRLQS	2	323	334	Vps9	0	0.6	0	0.6	0	0.4	0	1	0.3	2
IVLKGNPPRLQS	3	323	334	Vps9	0	0.4	0	0.4	0	0.4	0	0	0	0.8
IVLKGNPPRLQSNIQY	2	323	338	Vps9	0	0.3	0	0.6	0	0.4	0	1
KGNPPRLQS	2	326	334	Vps9	0	0.7	0	0.6	0	0.5	0	0	0	1
KGNPPRLQSN	2	326	335	Vps9	0	1	0	1.3	0	1.8	0	2
KGNPPRLQSNIQY	2	326	338	Vps9	0	0.3	0	0.4	0	0.6	0	1	0	0.9
QSNIQY	1	333	338	Vps9	0	0.4	0	0.8	0	0.5	0	2
ITRFCNPSRL	2	339	348	Vps9	-6.1	1	-8.8	0.9	0	0.4	14	0	0	0.5
ITRFCNPSRL	3	339	348	Vps9	-6	1.6	-8.9	1.5	0	0.6	15	0	0	0.8
ITRFCNPSRLMTGEDGYY	3	339	356	Vps9							9	2
CNPSRL	1	343	348	Vps9	-13.5	2.9					32	3
MTGEDGY	1	349	355	Vps9:Rab5 Binding Site	0	1.2	0	3.7	0	2.8	18	5
MTGEDGYY	1	349	356	Vps9:Rab5 Binding Site	-6.8	1.9	-7.8	1.8	0	0.8	18	0	-6.8	1.9
IEKLDA	1	367	372	Vps9:Rab5 Binding Site	0	1.7	0	1.8	0	0.6	5	2	-5.7	2.3
IEKLDAQSL	1	367	375	Vps9:Rab5 Binding Site							13	3
IEKLDAQSL	2	367	375	Vps9:Rab5 Binding Site	-5.5	0.9	-9.1	1	0	0.6	5	2	-7.9	3
IEKLDAQSLNL	1	367	377	Vps9:Rab5 Binding Site							7	1
IEKLDAQSLNL	2	367	377	Vps9:Rab5 Binding Site	0	2.5	-6.8	2.4	0	1.2	8	1	0	0.8
DAQSLNL	1	371	377	Vps9:Rab5 Binding Site	-10.1	6.6	-17.3	6.6	0	1.7	5	2
QSLNL	1	373	377	Vps9:Rab5 Binding Site	-28.2	2.4	-23.8	2.9			13	1
SQEDF	1	378	382	Vps9:Rab5 Binding Site	0	1.8	-9.5	1.8	0	0.8	0	1
SQEDFDRY	2	378	385	Vps9:Rab5 Binding Site	-9.2	1.5	-15	0.9	0	1.2	0	1	-6.3	1
DRYMSGQTSPRKQESEN	2	383	399	Rabaptin Binding Site	-4.9	2.4	0	2			0	5
DRYMSGQTSPRKQESENWSPDACL	3	383	406	Rabaptin Binding Site					0.4	0.7	0	1	0	0.9
MSGQTSPRKQESENWSPDACL	2	386	406	Rabaptin Binding Site							0	1	0	1.7
WSPDACL	1	400	406	Rabaptin Binding Site					6.2	1.9	0	3
GVKQMYKNLDL	2	407	417	Rabaptin Binding Site					8.1	2	0	2	0	2.3
GVKQMYKNLDLL	2	407	418	Rabaptin Binding Site					8	2.1	0	3	0	2.6
LSQLNERQERIMNEAKKLEKDLIDWTDGIAKE	5	418	449	Rabaptin Binding Site			-60	0.7			0	1
NERQERIMNE	2	422	431	Rabaptin Binding Site			-60	4.2	30.9	0.9	0	1	0	3
NERQERIMNEAKKLEKDLID	4	422	441	Rabaptin Binding Site			-60	2.7	18	1.8	0	1	0	1.2
NERQERIMNEAKKLEKDLIDWTDGIAKE	3	422	449	Rabaptin Binding Site							0	1	0	0.5
NERQERIMNEAKKLEKDLIDWTDGIAKE	4	422	449	Rabaptin Binding Site			-60	1.1			0	0	0	4
NERQERIMNEAKKLEKDLIDWTDGIAKE	5	422	449	Rabaptin Binding Site			-60	7.2	24.4	1.5	0	0	0	1.3
AKKLEKDLID	2	432	441	Rabaptin Binding Site					20.1	1.7	0	2
AKKLEKDLIDWTDGIA	2	432	447	Rabaptin Binding Site					13	3.8
AKKLEKDLIDWTDGIAKE	2	432	449	Rabaptin Binding Site							0	1	0.2	1.8
AKKLEKDLIDWTDGIAKE	3	432	449	Rabaptin Binding Site							0	1	0.3	1.5
VQDIVEKYPLE	2	450	460	Rabaptin Binding Site			-58.8	2.7			0	1	0	2
VQDIVEKYPLEIRPPNQSVA	3	450	469	Rabaptin Binding Site			-36	1.5			0	1
DIVEKYPLE	2	452	460	Rabaptin Binding Site			-55.3	2.1	14.4	2.4	0	2
IVEKYPLE	1	453	460	Rabaptin Binding Site			-38	3.8			0	2	0	3.3
IVEKYPLE	2	453	460	Rabaptin Binding Site			-33.2	4			0	1	0	1.3
IVEKYPLEIRPPNQSVA	2	453	469				-18.8	1.6	6.2	0.8	0	1
IRPPNQSV	1	461	468				0	2.7	0	1.4	0	2
IRPPNQSV	2	461	468				0	2.8	0	1.5	0	1	-0.2	2.1
IRPPNQSVA	1	461	469				0	2.9	0	0.5	0	1
IRPPNQSVA	2	461	469				0	5.2	0	1.9	0	1	0	4.2
IRPPNQSVAA	2	461	470				0	2.1	0	4.1	0	1
AIDSE	1	470	474				0	2.8	0	1	0	3
AIDSENVENDKLPPPLQPQVY	2	470	490				0	2.1			0	2	0	4
NVENDKLPPPLQPQVY	2	475	490				0	1.4	0	1.4			0	1.5
