# Supplementary material for: Auto-regulation of Rab5 GEF activity in Rabex5 by allosteric structural changes, catalytic core dynamics and ubiquitin binding
Source: eLife. 2019 Nov 13;8:e46302. doi: 10.7554/eLife.46302 (PMC6855807; doi:10.7554/eLife.46302)
Supplement: Figure 5—source data 1. [file elife-46302-fig5-data1.xlsx]

## Sheet: Result sheet
Method name: Jeni_Mant (Modified)								Fig 5A									Fig 5B
Application: SparkControl				V1.2.20
Device: Spark 20M				Serial number: 1608002530
Firmware:				LUM:V5.0.1|ABS:V4.2.10|ABS_MEX:V5.0.4|MTP:V11.0.2|FLUOR:V5.0.8|FLUOR_FP:V5.0.2|FLUOR_BOTTOM:V5.0.2|FLUOR_MEM:V5.0.4|FLUOR_MEX:V5.0.4|GCM:V3.0.2|INJ:V3.0.10
Date:				2018-08-31
Time:				09:42
System				PC-8J53XD2
User				NT AUTHORITY\NETWORK SERVICE
Plate				[GRE384fb] - Greiner 384 Flat Black [GRE384fb]
Lid lifter				No lid
Humidity Cassette				No humidity cassette
List of actions in this measurement script:
Plate
	Shaking
	Kinetic
		Fluorescence Top Reading				MANT
Name				GRE384fb
Plate layout
Plate area				A6-O7
								Fig 5C									Fig 5D
Start Time				2018-08-31 08:56:31
Shaking (Linear) Duration				20	s
Shaking (Linear) Position				Current
Shaking (Linear) Amplitude				1	mm
Shaking (Linear) Frequency				1440	rpm
End Time				2018-08-31 08:56:51
Mode	Kinetic
Kinetic duration				00:45:00	hh:mm:ss
Interval time				00:00:10	hh:mm:ss
Mode	Fluorescence Top Reading
Excitation				Monochromator
Excitation wavelength				355	nm
Excitation bandwidth				7.5	nm
Emission				Monochromator
Emission wavelength				448	nm
Emission bandwidth				7.5	nm
Gain				100	Manual
Mirror				AUTOMATIC
Number of flashes				20
Integration time				40	µs
Lag time				0	µs
Settle time				50	ms
Z-Position				20000	µm
Z-Position mode				Manual
Part of Plate				A6-O7
Start Time				2018-08-31 08:56:53
MANT
Cycle Nr.	1	2	3	4	5	6	7	8	9	10	11	12	13	14	15	16	17	18	19	20	21	22	23	24	25	26	27	28	29	30	31	32	33	34	35	36	37	38	39	40	41	42	43	44	45	46	47	48	49
Time [s]	0	9.724	19.73	29.733	39.735	49.724	59.733	69.727	79.731	89.729	99.735	109.727	119.743	129.734	139.747	149.737	159.73	169.736	179.738	189.744	199.738	209.745	219.739	229.745	239.738	249.753	259.732	269.74	279.741	289.735	299.757	309.734	319.742	329.732	339.755	349.746	359.768	369.742	379.753	389.757	399.744	409.742	419.751	429.757	439.748	449.783	459.745	469.76	479.755
Temp. [°C]	22.2	22.2	22.1	22.2	22.1	22	22.1	22.1	22	22.1	22	22	22	22.1	21.9	22.1	22	22	22	22.1	21.9	22	22	22	22	22	22	22	22	22.1	21.9	22	22	21.9	22	22	21.9	22	22	22	22	22.1	21.9	22.1	22	22.1	22	22.1	22.1
Time [s]	0	9.724	19.73	29.733	39.735	49.724	59.733	69.727	79.731	89.729	99.735	109.727	119.743	129.734	139.747	149.737	159.73	169.736	179.738	189.744	199.738	209.745	219.739	229.745	239.738	249.753	259.732	269.74	279.741	289.735	299.757	309.734	319.742	329.732	339.755	349.746	359.768	369.742	379.753	389.757	399.744	409.742	419.751	429.757	439.748	449.783	459.745	469.76	479.755
WT	651	639	630	612	612	599	594	589	569	578	556	563	540	533	525	528	527	521	499	503	512	499	488	473	481	469	477	448	475	468	462	457	450	443	443	435	448	436	437	425	433	421	426	418	418	411	411	417	398
WT	696	691	680	669	657	657	646	626	625	616	598	600	581	583	566	565	554	555	537	546	534	521	518	509	500	503	506	488	487	486	472	468	467	459	461	455	450	449	443	449	432	440	426	434	432	418	428	412	424
WT	691	677	651	655	652	638	630	619	614	610	607	579	584	579	566	561	566	547	551	538	525	525	533	513	512	500	491	498	476	476	471	478	472	462	453	467	446	451	452	445	440	437	435	440	435	435	418	432	425
WT + 0.5	727	718	698	681	676	656	659	644	634	611	630	602	597	592	584	566	560	559	547	554	555	539	528	532	517	516	517	487	485	496	481	499	479	479	466	460	475	466	465	458	470	461	441	437	440	443	439	442	434
WT + 0.5	674	677	640	650	646	629	622	610	597	596	570	568	574	537	548	533	550	532	517	511	527	500	494	502	479	484	474	461	489	470	461	463	441	450	450	454	442	440	441	429	441	428	426	413	415	406	423	415	416
WT + 0.5	712	713	689	684	659	644	651	632	614	612	616	595	582	577	566	560	549	533	542	526	528	526	521	501	511	501	494	483	483	471	475	464	453	450	446	455	453	450	444	436	427	429	418	426	425	422	421	416	423
WT + 1	491	483	475	457	442	447	427	431	427	412	422	412	396	392	388	374	378	365	374	370	354	355	357	347	341	343	324	333	328	327	320	319	318	312	321	302	322	308	304	302	300	293	291	305	293	290	302	291	285
WT + 1	694	674	659	660	655	635	628	621	592	598	599	575	552	553	527	529	529	526	496	508	510	497	501	487	481	483	473	455	461	448	467	446	440	440	441	429	411	414	431	426	414	411	409	413	405	402	401	388	402
WT + 1	682	657	643	623	642	612	617	584	595	583	582	580	572	556	556	528	537	524	518	512	509	504	501	486	491	483	492	476	473	472	472	460	456	458	453	446	428	435	444	437	435	434	415	426	428	420	422	416	408
WT + 2	644	638	595	611	583	603	576	569	560	555	538	528	506	512	503	489	493	476	482	472	459	455	456	449	452	445	440	424	424	424	428	417	412	407	407	407	411	404	378	395	386	383	389	384	377	382	386	374	370
WT + 2	644	632	606	620	601	597	581	564	557	544	530	520	526	518	521	506	499	488	475	484	471	450	458	464	455	439	429	438	433	441	435	422	417	416	401	407	400	406	410	398	392	396	390	387	387	384	390	375	377
WT + 2	668	662	657	638	636	635	601	585	593	586	570	585	560	545	551	541	543	520	516	514	510	502	488	490	491	493	473	471	474	478	461	464	443	449	444	438	439	437	428	436	430	432	420	422	410	427	414	404	408
dUb	690	670	649	640	607	611	599	593	577	558	543	538	536	525	503	490	490	489	479	481	483	459	447	454	448	450	445	440	435	432	426	429	418	430	420	410	413	405	416	395	398	414	411	387	399	400	405	383	397
dUb	721	696	693	673	663	660	650	617	588	602	584	569	557	540	531	547	523	519	522	512	491	485	480	481	477	465	469	462	453	454	444	448	437	436	432	417	424	419	424	416	427	410	424	414	426	410	417	411	412
dUb	731	694	678	672	651	639	622	596	591	587	565	555	547	541	531	521	523	499	497	497	503	502	479	483	475	466	462	439	464	457	449	454	442	438	445	444	435	427	427	430	420	430	428	415	420	419	420	415	411
dUb + 0.5	733	702	679	659	647	620	618	605	597	585	573	567	541	544	524	514	518	514	514	494	488	475	471	463	465	449	473	444	445	459	436	445	431	436	430	423	427	419	410	419	414	410	404	405	404	417	392	391	390
dUb + 0.5	726	700	701	678	676	629	639	610	600	579	577	565	568	551	533	518	533	521	514	510	503	488	495	480	493	470	467	457	472	456	470	456	447	446	442	437	429	429	429	414	436	429	429	427	422	417	418	424	420
dUb + 0.5	800	784	757	738	728	712	683	680	657	652	640	613	608	598	589	584	567	572	551	546	539	528	531	513	506	512	521	509	489	505	492	477	482	496	479	475	469	466	468	459	458	456	452	467	456	466	469	449	458
dUb + 1	696	682	669	644	636	618	628	588	602	586	562	563	555	549	531	519	518	521	499	504	498	495	500	486	466	467	464	461	449	452	443	448	434	442	431	436	434	438	437	429	408	413	408	420	416	406	416	411	407
dUb + 1	802	757	755	734	709	707	685	675	647	641	626	614	608	612	574	578	578	559	546	547	532	537	508	515	507	503	511	493	489	494	483	478	460	486	476	478	462	450	455	462	451	459	449	443	442	440	437	446	436
dUb + 1	648	613	607	591	572	561	538	525	519	494	498	501	489	489	467	463	468	456	438	453	427	440	425	420	422	402	408	411	398	413	402	403	407	387	382	386	389	386	369	397	381	377	375	374	361	374	383	369	371
dUb + 2	711	687	656	648	643	617	614	586	576	562	559	538	558	537	521	523	499	500	504	484	478	477	481	473	476	458	453	461	441	451	444	440	443	434	445	434	444	415	424	425	425	413	421	409	414	402	401	412	408
dUb + 2	754	719	716	680	665	670	637	628	606	605	594	561	577	567	551	534	551	526	514	514	506	501	505	496	476	476	492	496	467	486	474	464	461	453	462	466	450	458	452	444	435	441	449	441	442	435	440	451	438
dUb + 2	616	599	588	558	560	563	540	508	509	501	500	493	470	467	457	453	439	447	427	439	424	421	425	413	402	404	407	391	390	392	390	375	381	384	387	369	376	372	376	374	368	360	366	357	368	368	357	366	356
p273 0	460	455	457	453	445	434	417	410	431	395	388	386	385	380	381	360	365	359	358	347	341	345	329	333	339	332	325	331	322	322	315	321	307	305	310	309	301	293	299	289	288	285	288	286	281	280	278	273	279
p281 0	714	702	677	670	669	661	640	630	611	615	614	602	581	579	583	558	545	548	533	538	515	528	522	510	505	509	499	503	498	497	478	475	465	477	461	460	459	440	443	442	448	447	429	434	431	433	437	422	421
p273 5%	763	766	750	745	749	718	712	703	700	698	673	687	668	679	662	654	640	635	628	627	618	607	615	593	598	581	594	588	580	579	575	560	566	536	570	548	539	543	543	525	527	528	531	528	511	531	509	508	501
p281 5%	726	725	716	696	684	686	672	665	644	647	622	633	628	621	596	585	587	586	598	565	565	569	566	538	532	537	535	529	521	519	519	516	520	510	495	509	493	499	495	477	482	484	490	473	478	479	485	477	463
p273 10%	775	788	783	757	739	745	740	725	713	722	718	700	692	694	690	668	664	680	657	657	645	646	651	636	638	635	627	646	616	604	614	593	597	599	604	595	597	589	598	582	574	569	572	569	564	568	550	567	568
p281 10%	690	700	688	685	669	650	669	651	641	626	632	627	604	585	606	597	594	589	568	577	569	567	557	561	532	556	547	536	535	516	536	520	524	521	525	510	509	510	500	492	493	501	489	480	498	494	497	496	480
One phase decay
Best-fit values	WT	WT	WT	WT + 0.5	WT + 0.5	WT + 0.5	WT + 1	WT + 1	WT + 1	WT + 2	WT + 2	WT + 2	dUb	dUb	dUb	dUb + 0.5	dUb + 0.5	dUb + 0.5	dUb + 1	dUb + 1	dUb + 1	dUb + 2	dUb + 2	dUb + 2	p273 0	p281 0	p273 5%	p281 5%	p273 10%	p281 10%
Y0	641.1	699.1	683	717.5	674.3	710.4	481.5	689.1	667.1	640.2	642.5	661.9	685.2	726.1	712.9	715.9	723.9	797.6	694.7	790.8	628.6	693.8	734.8	613.5	460.1	700.8	755.5	708	762.4	684.5
Plateau	340.6	337.8	337.4	367.6	338.7	342.1	247	336.2	349.7	336.6	336.2	321.7	374.2	383.2	391.9	377.6	390	422	381	414.1	351	385.1	409.5	341.7	223.6	337.9	381.6	371.8	423.8	390.3
K	0.003088	0.003112	0.002898	0.00344	0.003266	0.003436	0.003584	0.003656	0.003355	0.004211	0.00408	0.002865	0.005795	0.005501	0.005692	0.00559	0.005552	0.005659	0.005244	0.005611	0.005799	0.005504	0.005632	0.005832	0.003081	0.00306	0.002161	0.002499	0.001813	0.002313
Half Life	224.5	222.7	239.2	201.5	212.3	201.8	193.4	189.6	206.6	164.6	169.9	242	119.6	126	121.8	124	124.8	122.5	137.4	123.5	119.5	125.9	123.1	118.9	225	226.5	320.8	277.4	382.3	299.6
Tau	323.8	321.3	345.1	290.7	306.2	291.1	279	273.5	298	237.5	245.1	349.1	172.6	181.8	175.7	178.9	180.1	176.7	198.3	178.2	172.4	181.7	177.5	171.5	324.6	326.8	462.8	400.1	551.5	432.3
Span	300.4	361.3	345.6	349.9	335.6	368.3	234.5	352.9	317.4	303.6	306.4	340.2	311	342.9	321.1	338.3	333.8	375.6	313.6	376.7	277.6	308.7	325.3	271.8	236.6	362.9	373.9	336.2	338.6	294.2
Std. Error
Y0	2.327	2.037	2.082	2.496	2.44	2.269	2.111	2.557	2.293	2.586	2.418	2.351	3.152	3.12	3.333	2.941	3.097	2.977	2.913	3.432	3.213	3.342	3.511	2.909	1.972	2.205	2.456	3.097	2.615	2.688
Plateau	0.5611	0.4879	0.531	0.5501	0.5611	0.5006	0.4506	0.5373	0.5157	0.4899	0.4683	0.606	0.4854	0.496	0.519	0.4629	0.4895	0.4651	0.489	0.5389	0.4946	0.5311	0.5501	0.4464	0.4764	0.5358	0.8474	0.9112	1.124	0.8584
K	4.042e-05	2.96e-05	2.995e-05	4.058e-05	3.965e-05	3.501e-05	5.299e-05	4.335e-05	4.027e-05	5.758e-05	5.188e-05	3.406e-05	9.177e-05	7.847e-05	9.246e-05	7.611e-05	8.069e-05	7.018e-05	7.39e-05	8.002e-05	0.0001049	9.339e-05	9.516e-05	9.754e-05	4.341e-05	3.148e-05	2.687e-05	4.123e-05	2.893e-05	3.892e-05
Span	2.269	1.986	2.023	2.444	2.384	2.221	2.07	2.508	2.243	2.547	2.379	2.283	3.123	3.089	3.302	2.912	3.066	2.948	2.88	3.398	3.183	3.309	3.477	2.883	1.922	2.148	2.339	2.982	2.451	2.574
95% Confidence Intervals
Y0	636.5 to 645.6	695.1 to 703.1	678.9 to 687.1	712.6 to 722.4	669.5 to 679.0	706.0 to 714.9	477.4 to 485.6	684.1 to 694.1	662.6 to 671.6	635.1 to 645.3	637.8 to 647.3	657.3 to 666.5	679.0 to 691.4	720.0 to 732.2	706.4 to 719.5	710.1 to 721.7	717.8 to 730.0	791.8 to 803.4	688.9 to 700.4	784.1 to 797.6	622.3 to 634.9	687.3 to 700.4	727.9 to 741.7	607.7 to 619.2	456.3 to 464.0	696.5 to 705.1	750.7 to 760.3	701.9 to 714.1	757.2 to 767.5	679.2 to 689.7
Plateau	339.5 to 341.7	336.8 to 338.7	336.4 to 338.4	366.5 to 368.7	337.6 to 339.8	341.1 to 343.1	246.2 to 247.9	335.2 to 337.3	348.7 to 350.7	335.7 to 337.6	335.2 to 337.1	320.5 to 322.9	373.2 to 375.1	382.2 to 384.2	390.9 to 392.9	376.7 to 378.5	389.1 to 391.0	421.1 to 422.9	380.1 to 382.0	413.0 to 415.2	350.1 to 352.0	384.1 to 386.2	408.5 to 410.6	340.8 to 342.6	222.7 to 224.5	336.9 to 339.0	379.9 to 383.2	370.0 to 373.6	421.6 to 426.0	388.6 to 392.0
K	0.003009 to 0.003167	0.003054 to 0.003170	0.002839 to 0.002957	0.003361 to 0.003520	0.003188 to 0.003343	0.003367 to 0.003504	0.003480 to 0.003688	0.003571 to 0.003741	0.003276 to 0.003434	0.004098 to 0.004324	0.003979 to 0.004182	0.002798 to 0.002931	0.005615 to 0.005975	0.005347 to 0.005655	0.005511 to 0.005873	0.005441 to 0.005739	0.005394 to 0.005710	0.005521 to 0.005796	0.004899 to 0.005189	0.005454 to 0.005768	0.005594 to 0.006005	0.005321 to 0.005687	0.005446 to 0.005819	0.005641 to 0.006023	0.002996 to 0.003166	0.002998 to 0.003121	0.002108 to 0.002213	0.002418 to 0.002580	0.001757 to 0.001870	0.002237 to 0.002390
Half Life	218.8 to 230.4	218.6 to 226.9	234.4 to 244.1	196.9 to 206.2	207.3 to 217.4	197.8 to 205.9	187.9 to 199.2	185.3 to 194.1	201.8 to 211.6	160.3 to 169.1	165.7 to 174.2	236.5 to 247.8	116.0 to 123.4	122.6 to 129.6	118.0 to 125.8	120.8 to 127.4	121.4 to 128.5	119.6 to 125.5	133.6 to 141.5	120.2 to 127.1	115.4 to 123.9	121.9 to 130.3	119.1 to 127.3	115.1 to 122.9	219.0 to 231.4	222.1 to 231.2	313.2 to 328.8	268.7 to 286.6	370.7 to 394.6	290.1 to 309.9
Tau	315.7 to 332.4	315.4 to 327.4	338.2 to 352.2	284.1 to 297.5	299.1 to 313.7	285.4 to 297.0	271.2 to 287.3	267.3 to 280.0	291.2 to 305.2	231.3 to 244.0	239.1 to 251.3	341.1 to 357.4	167.4 to 178.1	176.8 to 187.0	170.3 to 181.5	174.2 to 183.8	175.1 to 185.4	172.5 to 181.1	192.7 to 204.1	173.4 to 183.3	166.5 to 178.8	175.8 to 187.9	171.9 to 183.6	166.0 to 177.3	315.9 to 333.8	320.4 to 333.5	451.8 to 474.4	387.6 to 413.5	534.8 to 569.3	418.5 to 447.0
Span	296.0 to 304.9	357.4 to 365.2	341.6 to 349.6	345.1 to 354.7	330.9 to 340.3	363.9 to 372.6	230.4 to 238.5	348.0 to 357.8	313.0 to 321.8	298.6 to 308.6	301.7 to 311.0	335.7 to 344.6	304.9 to 317.2	336.9 to 349.0	314.6 to 327.5	332.6 to 344.0	327.8 to 339.9	369.8 to 381.4	308.0 to 319.3	370.1 to 383.4	271.3 to 283.8	302.3 to 315.2	318.5 to 332.1	266.1 to 277.4	232.8 to 240.3	358.7 to 367.1	369.3 to 378.5	330.4 to 342.1	333.8 to 343.4	289.1 to 299.2
Goodness of Fit
Degrees of Freedom	267	267	267	267	267	267	267	267	267	267	267	267	267	267	267	267	267	267	267	267	267	267	267	267	267	267	267	267	267	267
R²	0.9898	0.9946	0.9937	0.9915	0.9911	0.9936	0.9866	0.9913	0.9912	0.9882	0.9899	0.9917	0.9839	0.9869	0.9831	0.9881	0.9864	0.9901	0.9863	0.9869	0.9791	0.9816	0.9818	0.9821	0.9882	0.9937	0.992	0.9849	0.9883	0.9849
Absolute Sum of Squares	11856	9025	10008	12438	12428	10290	8593	12387	10727	11217	10073	12885	12641	12958	14361	11352	12663	11510	12173	15408	13131	14857	16073	10715	8528	10724	17645	25008	22774	20037
Sy.x	6.664	5.814	6.122	6.825	6.823	6.208	5.673	6.811	6.339	6.482	6.142	6.947	6.881	6.967	7.334	6.521	6.887	6.566	6.752	7.597	7.013	7.46	7.759	6.335	5.652	6.338	8.129	9.678	9.236	8.663
Constraints
K	K > 0.0	K > 0.0	K > 0.0	K > 0.0	K > 0.0	K > 0.0	K > 0.0	K > 0.0	K > 0.0	K > 0.0	K > 0.0	K > 0.0	K > 0.0	K > 0.0	K > 0.0	K > 0.0	K > 0.0	K > 0.0	K > 0.0	K > 0.0	K > 0.0	K > 0.0	K > 0.0	K > 0.0	K > 0.0	K > 0.0	K > 0.0	K > 0.0	K > 0.0	K > 0.0
Number of points
% Error	0.0130894	0.00951157	0.0103347	0.0117965	0.0121402	0.0101892	0.0147852	0.0118572	0.012003	0.0136737	0.0127157	0.0118883	0.0158361	0.0142647	0.0162439	0.0136154	0.0145335	0.0124015	0.0140923	0.0142613	0.0180893	0.0169677	0.0168963	0.016725	0.0140896	0.0102876	0.0124341	0.0164986	0.015957	0.0168266
kcat/KM	6176	6224	5796	6880	6532	6872	7168	7312	6710	8422	8160	5730	11590	11002	11384	11180	11104	11318	10488	11222	11598	11008	11264	11664	12324	12240	8644	9996	7252	9252
Average	6065.33			6761.33			7063.33			8291		ran out of Ub	11325.3			11200.7			11410			11312
	tetraUb	Rabex5 Complex	Rabex5 deltaUb Complex	WT Stdev	dUb Stdev		WT % Control	dUb % Control	WT Stdev	dUb Stdev
	0	6065.33	11325.3	234.481	298.358		1	1	0.0386592	0.0263443
	0.5	6761.33	11200.7	198.649	108.487		1.11475	0.988992	0.0293801	0.00968572
	1	7063.33	11410	314.352	265.872		1.16454	1.00748	0.0445048	0.0233017
	2	8291	11312	185.262	330.624		1.36695	0.998823	0.0223449	0.0292277
[truncated: 221 more columns]
