# Supplementary material for: Auto-regulation of Rab5 GEF activity in Rabex5 by allosteric structural changes, catalytic core dynamics and ubiquitin binding
Source: eLife. 2019 Nov 13;8:e46302. doi: 10.7554/eLife.46302 (PMC6855807; doi:10.7554/eLife.46302)
Supplement: Figure 6—source data 1. [file elife-46302-fig6-data1.xlsx]

## Sheet: ComplexRab5o + GTPgS May2016
Sequence	Charge	Start	End	Features	Delta %D	Stdev	Delta %D	Stdev
SLKSERRGIHVDQSEL	3	2	17	[Zn finger UBD:2]	0	0.9	2	0.9
KSERRGIHVDQSEL	3	4	17	[Zn finger UBD:2]	0	0.7	-0.3	0.7
LCKKGCGYYGNPAWQGF	2	18	34	[Zn finger UBD:17]	-5.8	1.2	-5.8	1.2
LCKKGCGYYGNPAWQGF	3	18	34	[Zn finger UBD:17]	-5.6	1.1	-5.6	1.1
LCKKGCGYYGNPAWQGFCSKC	3	18	38	[Zn finger UBD:21]	-6.6	3.1	-6.6	3.1
WREEYHKARQKQIQED	2	39	54	[Zn finger UBD:9 MIU UBD:7]	1.8	1.7	1.8	1.7
WREEYHKARQKQIQED	3	39	54	[Zn finger UBD:9 MIU UBD:7]	2.7	0.6	2.7	0.6
WREEYHKARQKQIQED	4	39	54	[Zn finger UBD:9 MIU UBD:7]	3	1	3	1
LAERLQREEEEA	2	57	68	[MIU UBD:12]	0	1.6	0.2	1.6
AERLQREEEEA	3	58	68	[MIU UBD:11]	0	1.2	0.4	1.2
FASSQSSQGAQSLT	2	69	82	[MIU UBD:6]	0	1.3	0.1	1.3
FASSQSSQGAQSLTF	2	69	83	[MIU UBD:6]	0	2.3	-2.2	2.3
FSKFEEKKTNEKTRKVTTVKKFFSASSRVGAKKAEIQE	6	83	120		5.4	3.9	5.4	3.9
AKAPSPSINRQTSIET	2	121	136		0	2.9	1.1	2.9
DRVSKEF	2	137	143		0	3.4	-1.4	3.4
LKTFHKTGQE	3	147	156		0	4.3	-0.8	4.3
LKTFHKTGQEIYKQTKL	2	147	163		6.6	1	6.6	1
LKTFHKTGQEIYKQTKL	3	147	163		5.8	1.5	5.8	1.5
FLEAMHYKRDLSIE	2	164	177		0	1.7	2.2	1.7
FLEAMHYKRDLSIE	3	164	177		0	1.1	0.6	1.1
FLEAMHYKRDLSIEE	2	164	178		0	1.3	0.9	1.3
FLEAMHYKRDLSIEE	3	164	178		0	0.7	0.8	0.7
QSECTQDF	1	179	186		0	1.5	-0.1	1.5
FYQNVAE	1	186	192		0	2.9	2.1	2.9
YQNVAE	1	187	192		0	2	1.1	2
QIEKYIM	2	211	217		0	1.8	0.5	1.8
IEKYIM	2	212	217		0	0.8	0.7	0.8
YKYVF	1	221	225		0	1.1	0.5	1.1
YKYVFCPETTDDEKKDLAIQKRIRALHWVTPQM	4	221	253		2.9	0.8	2.9	0.8
CPETTDDEKKDLAIQKRIRALHWVTPQM	3	226	253		2.2	0.7	2.2	0.7
LCVPVNEEIPEVSDM	2	254	268		4.7	0.6	4.7	0.6
VVKAITD	1	269	275	[Vps9 domain:5]	0	1.8	-0.1	1.8
KAITD	1	271	275	[Vps9 domain:5]	0	3.6	-1.1	3.6
MDSKRVPRDKLAC	2	279	291	[Vps9 domain:13]	0	2.8	-0.4	2.8
DSKRVPRDKLAC	2	280	291	[Vps9 domain:12]	0	1.3	1	1.3
DSKRVPRDKLAC	3	280	291	[Vps9 domain:12]	0	0.6	0.1	0.6
ACITKCSKHIFNA	3	290	302	[Vps9 domain:13]	0	0.4	1.4	0.4
ITKCSKHIFNA	2	292	302	[Vps9 domain:11]	0	0.5	0.9	0.5
ITKCSKHIFNA	3	292	302	[Vps9 domain:11]	0	0.3	0.6	0.3
ITKCSKHIFNAIKITKNEPASADDFL	3	292	317	[Vps9 domain:26 Rab5 binding loop:13]	5.2	1.5	5.2	1.5
IKITKNEPASADDFL	2	303	317	[Vps9 domain:15 Rab5 binding loop:13]	3.4	0.8	3.4	0.8
IKITKNEPASADDFL	3	303	317	[Vps9 domain:15 Rab5 binding loop:13]	3.3	1	3.3	1
IKITKNEPASADDFLPTL	2	303	320	[Vps9 domain:18 Rab5 binding loop:13]	0	1.1	7	1.1
PTLIY	1	318	322	[Vps9 domain:5]	0	1.5	-0.1	1.5
IVLKGNPPRLQS	3	323	334	[Vps9 domain:12]	0	0.5	0	0.5
KGNPPRLQS	2	326	334	[Vps9 domain:9]	0	0.9	-0.9	0.9
KGNPPRLQSNIQY	2	326	338	[Vps9 domain:13]	0	1.4	-0.5	1.4
ITRFCNPSRL	2	339	348	[Vps9 domain:10 Rab5 binding helix:2]	0	0.9	1.8	0.9
ITRFCNPSRL	3	339	348	[Vps9 domain:10 Rab5 binding helix:2]	0	0.7	0.7	0.7
ITRFCNPSRLMTGEDGYY	3	339	356	[Vps9 domain:18 Rab5 binding helix:10]	0	4.2	0.9	4.2
IEKLDAQSLNL	2	367	377	[Vps9 domain:5 Rab5 binding helix:11]	0	1.2	3.2	1.2
QSLNL	1	373	377	[Rab5 binding helix:5]	0	4.2	-2.9	4.2
DRYMSGQTSPRKQESENWSPDACL	3	383	406	[Rabaptin5 binding site:14]	4.7	0.6	4.7	0.6
MSGQTSPRKQESENWSPDACL	2	386	406	[Rabaptin5 binding site:14]	3.4	1.6	3.4	1.6
GVKQMYKNLDL	2	407	417	[Rabaptin5 binding site:11]	0	1.9	1.7	1.9
GVKQMYKNLDLL	2	407	418	[Rabaptin5 binding site:12]	0	2.4	-0.6	2.4
NERQERIMNE	2	422	431	[Rabaptin5 binding site:10]	0	1.3	1.6	1.3
NERQERIMNEAKKLEKDLIDWTDGIAKE	4	422	449	[Rabaptin5 binding site:28]	0	0.9	-0.3	0.9
AKKLEKDLIDWTDGIAKE	2	432	449	[Rabaptin5 binding site:18]	0	1.7	-1.5	1.7
AKKLEKDLIDWTDGIAKE	3	432	449	[Rabaptin5 binding site:18]	0	0.9	0.2	0.9
VQDIVEKYPLEIRPPNQSVA	3	450	469	[Rabaptin5 binding site:4]	0	4.1	-0.8	4.1
IVEKYPLE	2	453	460	[Rabaptin5 binding site:1]	0	1.4	0.6	1.4
IRPPNQSVA	2	461	469		0	0.9	-0.5	0.9
IRPPNQSVAA	2	461	470		0	2.2	-1.1	2.2
NVENDKLPPPLQPQVY	2	475	490		0	2.5	1	2.5
